# Supplementary material for: An anionic beryllium hydride dimer with an exceedingly short Be⋯Be distance
Source: Royal Society of Chemistry journal article supplement (doi:10.1039/d3dt03976e), 2023-12-21
Supplement: d3dt03976e1.pdf [file d3dt03976e1.pdf]

## Supporting Information

### **An anionic beryllium hydride dimer with an exceedingly short Be···Be distance**

Terrance J. Hadlington<sup>\*,a</sup>

<sup>a</sup> Lehrstuhl für anorganische Chemie mit Schwerpunkt neue Materialien, Technische Universität München,  
Lichtenbergstraße 4, 85747 Garching

|                                           |     |
|-------------------------------------------|-----|
| 1. Experimental methods and data.....     | S2  |
| 2. X-ray crystallographic details.....    | S15 |
| 3. Computational methods and details..... | S17 |
| 4. References.....                        | S43 |

## 1. Experimental methods and data

**General considerations.** All experiments and manipulations were carried out under dry oxygen free argon atmosphere using standard Schlenk techniques or in a MBraun inert atmosphere glovebox containing an atmosphere of high purity argon. THF was dried by distillation over a sodium/benzophenone mixture and stored over activated 4Å mol sieves. C<sub>6</sub>D<sub>6</sub> was dried, degassed and stored over a potassium mirror. All other solvents were dried over activated 4Å mol sieves. [(<sup>i</sup>Pr<sub>3</sub>Si)(Dipp)NK] (L\*; Dipp = 2,6-<sup>i</sup>Pr<sub>2</sub>-C<sub>6</sub>H<sub>3</sub>),<sup>1</sup> and [Br<sub>2</sub>Be·(Et<sub>2</sub>O)<sub>2</sub>]<sup>2</sup> were synthesized according to known literature procedures. All other reagents were used as received. NMR spectra were recorded on a Bruker AV 400 Spectrometer. The <sup>1</sup>H and <sup>13</sup>C{<sup>1</sup>H} NMR spectra were referenced to the residual solvent signals as internal standards. <sup>29</sup>Si{<sup>1</sup>H} NMR spectra were externally calibrated with SiMe<sub>4</sub>. <sup>9</sup>Be NMR spectra were externally calibrated with BeBr<sub>2</sub>·(Et<sub>2</sub>O)<sub>2</sub>. Liquid Injection Field Desorption Ionization Mass Spectrometry (LIFDI-MS) was measured directly from an inert atmosphere glovebox with a Thermo Fisher Scientific Exactive Plus Orbitrap equipped with an ion source from Linden CMS.<sup>3</sup> Elemental analyses (C, H, N) were performed with a combustion analyzer (elementar vario EL, Bruker).

**CAUTION:** Beryllium, most notably as fine powders, and beryllium compounds are regarded as highly toxic, and are potential carcinogens. A severe allergic reaction can also occur if inhaled, with the risk of causing chronic beryllium disease.<sup>4</sup> One should take care and use adequate safety measures (i.e. breathing apparatus, protective clothing, well-ventilated fume-hoods) for any manipulations involving beryllium and compounds containing this element.<sup>5</sup>

**[L\*BeBr·Et<sub>2</sub>O], 1.** A solid mixture of [(<sup>i</sup>Pr<sub>3</sub>Si)(Dipp)NK] (2.35 g, 6.33 mmol) and [Br<sub>2</sub>Be·(Et<sub>2</sub>O)<sub>2</sub>] (2.00 g, 6.33 mmol) was cooled to -80 °C with rapid stirring. Toluene (50 mL) was added to this rapidly stirred mixture, and the reaction allowed to slowly warm over the course of 16 h. All volatiles were subsequently removed *in-vacuo*, the oily residue extracted in heptane (~50 mL), and the suspension filtered. The filtrate was concentrated to ~15 mL, and stored at -40°C overnight, leading to the deposition of a large crops of colourless crystals, which were collected by filtration and dried under vacuum. Compound **1** was isolated as an off-white waxy crystalline powder (2.10 g, 67%). Crystals grown in this manner were suitable for X-ray diffraction analysis.

**<sup>1</sup>H NMR** (C<sub>6</sub>D<sub>6</sub>, 400 MHz, 298 K): δ = 0.78 (t, 4H, <sup>3</sup>J<sub>HH</sub> = 7.1 Hz, Et<sub>2</sub>O-CH<sub>2</sub>), 1.16 (d, 6H, <sup>3</sup>J<sub>HH</sub> = 6.8 Hz, Dipp-<sup>i</sup>Pr-CH<sub>3</sub>), 1.32 (d, 18H, <sup>3</sup>J<sub>HH</sub> = 7.6 Hz, <sup>i</sup>Pr<sub>3</sub>Si-CH<sub>3</sub>), 1.37 (d, 6H, <sup>3</sup>J<sub>HH</sub> = 6.8 Hz, Dipp-<sup>i</sup>Pr-CH<sub>3</sub>), 1.67 (sept, 3H, <sup>3</sup>J<sub>HH</sub> = 7.6 Hz, <sup>i</sup>Pr<sub>3</sub>Si-CH), 3.02 (q, 6H, <sup>3</sup>J<sub>HH</sub> = 7.1 Hz, Et<sub>2</sub>O-CH<sub>3</sub>), 3.90 (sept, 2H, <sup>3</sup>J<sub>HH</sub> = 6.8 Hz, Dipp-<sup>i</sup>Pr-CH), 7.02-7.09 (m, 3H, Ar-CH).

**$^{13}\text{C}\{^1\text{H}\}$  NMR** ( $\text{C}_6\text{D}_6$ , 101 MHz, 298 K):  $\delta$  = 12.9 ( $\text{Et}_2\text{O}-\text{CH}_3$ ), 14.9 ( $^i\text{Pr}_3\text{Si}-\text{CH}$ ), 20.2 ( $^i\text{Pr}_3\text{Si}-\text{CH}_3$ ), 24.9 ( $\text{Dipp-}^i\text{Pr}-\text{CH}_3$ ), 26.3 ( $\text{Dipp-}^i\text{Pr}-\text{CH}_3$ ), 27.3 ( $\text{Dipp-}^i\text{Pr}-\text{CH}$ ), 69.8 ( $\text{Et}_2\text{O}-\text{CH}_2$ ), 123.6, 124.4, 146.3, 146.4 ( $\text{Ar}-\text{C}$ ).

**$^{29}\text{Si}\{^1\text{H}\}$  NMR** ( $\text{C}_6\text{D}_6$ , 99 MHz, 298 K):  $\delta$  = 2.7.

**$^9\text{Be}$  NMR** ( $\text{C}_6\text{D}_6$ , 58 MHz, 298 K):  $\delta$  = 9.0.

**MS/LIFDI-HRMS** found (calcd.)  $m/z$ : 406.1996 (406.1980) for  $[\text{M}-\text{Cl}]^+$ .

**Anal. calcd. for  $\text{C}_{25}\text{H}_{48}\text{BeBrNOSi}$** : C, 60.58%; H, 9.76%; N, 2.83%; found: C, 60.87%; H, 10.32%; N, 2.95%.

### **$[\text{L}^*\text{Be}(\mu\text{-H})_3\text{BeL}^*][\text{C}]$ , **2**.**

**A =  $[(\text{THF})_3\cdot\text{Li}(\mu\text{-Br})\text{Li}\cdot(\text{THF})_3]^+$ , **2a**.** Compound **1** (200 mg, 0.40 mmol) was dissolved in heptane (5 mL), and a 1M THF solution of  $\text{Li}[\text{HB}^s\text{Bu}_3]$  added (0.8 mL, 0.80 mmol). The mixture was briefly shaken, and allowed to stand overnight, leading to a formation of colourless crystals of **2a**, which were suitable for X-ray diffraction analysis. The solution was decanted, and the crystalline solid washed with a small amount of pentane (5 mL), and dried under vacuum, yielding a colourless crystalline solid (83 mg, 49 %).

**$^1\text{H}$  NMR** ( $\text{C}_6\text{D}_6$ , 400 MHz, 298 K):  $\delta$  = 1.23 (d, 12H,  $^3J_{\text{HH}} = 6.8$  Hz,  $\text{Dipp-}^i\text{Pr}-\text{CH}_3$ ), 1.28 (m, 24H,  $\text{THF}-\text{CH}_2$ ), 1.36 (overlapping d, 48H,  $\text{Dipp-}^i\text{Pr}-\text{CH}_3$  and  $^i\text{Pr}_3\text{Si}-\text{CH}_3$ ), 1.53 (sept, 6H,  $^3J_{\text{HH}} = 7.6$  Hz,  $^i\text{Pr}_3\text{Si}-\text{CH}$ ), 2.67 (br s, 3H,  $\text{Be}-\text{H}-\text{Be}$ ), 3.29 (m, 24H,  $\text{THF}-\text{CH}_2$ ), 4.17 (sept, 4H,  $^3J_{\text{HH}} = 6.8$  Hz,  $\text{Dipp-}^i\text{Pr}-\text{CH}$ ), 6.84 (m, 2H,  $p\text{-Ar}-\text{CH}$ ), 7.02 (m, 4pH,  $m\text{-Ar}-\text{CH}$ ).

**$^{13}\text{C}\{^1\text{H}\}$  NMR** ( $\text{C}_6\text{D}_6$ , 101 MHz, 298 K):  $\delta$  = 14.8 ( $^i\text{Pr}_3\text{Si}-\text{CH}$ ), 19.8 ( $^i\text{Pr}_3\text{Si}-\text{CH}_3$ ), 23.4 ( $\text{Dipp-}^i\text{Pr}-\text{CH}_3$ ), 25.4 ( $\text{THF}-\text{CH}_2$ ), 25.7 ( $\text{Dipp-}^i\text{Pr}-\text{CH}_3$ ), 27.3 ( $\text{Dipp-}^i\text{Pr}-\text{CH}$ ), 68.3 ( $\text{THF}-\text{CH}_2$ ), 121.9, 123.7, 146.3, 152.9 ( $\text{Ar}-\text{C}$ ).

**$^{29}\text{Si}\{^1\text{H}\}$  NMR** ( $\text{C}_6\text{D}_6$ , 99 MHz, 298 K):  $\delta$  = -1.0.

**$^9\text{Be}$  NMR** ( $\text{C}_6\text{D}_6$ , 58 MHz, 298 K):  $\delta$  = 4.5.

**Anal. calcd. for  $\text{C}_{66}\text{H}_{121}\text{Be}_2\text{BrLi}_2\text{N}_2\text{O}_6\text{Si}_2$** : C, 65.69%; H, 10.11%; N, 2.32%; found: C, 62.43%; H, 10.45%; N, 2.20%.

N.B. Carbon values were found to be low after running several samples, possibly due to silicon carbide formation.

**B =  $[(\text{TMEDA})_2\cdot\text{Li}]^+$ , **2b**.** Compound **1** (200 mg, 0.40 mmol) dissolved in toluene (5 mL), and a 1M THF solution of  $\text{Li}[\text{HB}^s\text{Bu}_3]$  (0.8 mL, 0.80 mmol) was added. The reaction was stirred for 2 h at ambient temperature, filtered, and concentrated to ~2 mL. The solution was layered with heptane (~10 mL), and stored for 3 days, leading to the formation of a crop of large colourless crystals suitable for X-ray diffraction analysis (68 mg, 40 %).

**<sup>1</sup>H NMR** (D<sub>8</sub>-THF, 400 MHz, 298 K): δ = 1.01 (d, 36H, <sup>3</sup>J<sub>HH</sub> = 7.6 Hz, <sup>i</sup>Pr<sub>3</sub>Si-CH<sub>3</sub>), 1.07 (d, 12H, <sup>3</sup>J<sub>HH</sub> = 6.8 Hz, Dipp-<sup>i</sup>Pr-CH<sub>3</sub>), 1.11 (d, 12H, <sup>3</sup>J<sub>HH</sub> = 6.8 Hz, Dipp-<sup>i</sup>Pr-CH<sub>3</sub>), 1.20 (sept, 6H, <sup>3</sup>J<sub>HH</sub> = 7.6 Hz, <sup>i</sup>Pr<sub>3</sub>Si-CH), 2.00 (br s, 3H, Be-*H*-Be), 2.15 (s, 24H, TMEDA-CH<sub>3</sub>), 2.31 (s, 8H, TMEDA-CH<sub>2</sub>), 3.99 (sept, 4H, <sup>3</sup>J<sub>HH</sub> = 6.8 Hz, Dipp-<sup>i</sup>Pr-CH), 6.60 (m, 2H, *p*-Ar-CH), 6.74 (m, 4H, *m*-Ar-CH).

**<sup>13</sup>C{<sup>1</sup>H} NMR** (D<sub>8</sub>-THF, 101 MHz, 298 K): δ = 15.4 (<sup>i</sup>Pr<sub>3</sub>Si-CH), 20.4 (<sup>i</sup>Pr<sub>3</sub>Si-CH<sub>3</sub>), 24.0 (Dipp-<sup>i</sup>Pr-CH<sub>3</sub>), 26.9 (Dipp-<sup>i</sup>Pr-CH<sub>3</sub>), 27.7 (Dipp-<sup>i</sup>Pr-CH), 46.4 (TMEDA-CH<sub>3</sub>), 59.1 (TMEDA-CH<sub>2</sub>), 120.5, 122.6, 147.1, 152.6 (Ar-C).

**<sup>29</sup>Si{<sup>1</sup>H} NMR** (D<sub>8</sub>-THF, 99 MHz, 298 K): δ = -5.1.

**<sup>9</sup>Be NMR** (C<sub>6</sub>D<sub>6</sub>, 58 MHz, 298 K): δ = -4.2.

**MS/LIFDI-HRMS** found (calcd.) m/z: 685.6027 (685.6026) for [M-((TMEDA)<sub>2</sub>Li)]<sup>+</sup>.

**[L\*Be(μ-H)<sub>3</sub>BeL\*]·[K(TMEDA)], 3.** Compound **1** (200 mg, 0.40 mmol) was dissolved in heptane (10 mL), and neat TMEDA added (0.07 mL, 0.44 mmol), leading to the precipitation of what is presumably L\*BeBr·TMEDA. The suspension was cooled to -80 °C with rapid stirring, and a THF solution of K[HB<sup>S</sup>Bu<sub>3</sub>] added (1M, 0.40 mL, 0.40 mmol). The reaction mixture was slowly warmed over the course of 4 h, leading to the dissolution of the copious precipitate, and formation of a fine colourless precipitate. The reaction mixture was then allowed to settle, filtered, and concentrated to ~3 mL, whereby small crystals began to form. These were redissolved by mild heating, and the flask left at ambient temperature overnight, leading to a crop of colourless crystals suitable for single-crystal X-ray diffraction analysis (95 mg, 56%).

**<sup>1</sup>H NMR** (C<sub>6</sub>D<sub>6</sub>, 400 MHz, 298 K): δ = 1.17 (d, 12H, <sup>3</sup>J<sub>HH</sub> = 6.8 Hz, Dipp-<sup>i</sup>Pr-CH<sub>3</sub>), 1.36 (d, 12H, <sup>3</sup>J<sub>HH</sub> = 6.8 Hz, Dipp-<sup>i</sup>Pr-CH<sub>3</sub>), 1.41 (d, 36H, <sup>3</sup>J<sub>HH</sub> = 7.6 Hz, <sup>i</sup>Pr<sub>3</sub>Si-CH<sub>3</sub>), 1.52 (sept, 6H, <sup>3</sup>J<sub>HH</sub> = 7.6 Hz, <sup>i</sup>Pr<sub>3</sub>Si-CH), 1.71 (s, 12H, TMEDA-CH<sub>3</sub>), 1.76 (s, 4H, TMEDA-CH<sub>2</sub>), 2.19 (br s, 3H, Be-*H*-Be), 4.23 (sept, 4H, <sup>3</sup>J<sub>HH</sub> = 6.8 Hz, Dipp-<sup>i</sup>Pr-CH), 6.71 (m, 2H, *p*-Ar-CH), 6.91 (m, 4H, *m*-Ar-CH).

**<sup>13</sup>C{<sup>1</sup>H} NMR** (C<sub>6</sub>D<sub>6</sub>, 101 MHz, 298 K): δ = 15.0 (<sup>i</sup>Pr<sub>3</sub>Si-CH), 20.0 (<sup>i</sup>Pr<sub>3</sub>Si-CH<sub>3</sub>), 23.8 (Dipp-<sup>i</sup>Pr-CH<sub>3</sub>), 26.2 (Dipp-<sup>i</sup>Pr-CH<sub>3</sub>), 27.1 (Dipp-<sup>i</sup>Pr-CH), 45.6 (TMEDA-CH<sub>3</sub>), 57.2 (TMEDA-CH<sub>2</sub>), 120.9, 123.3, 147.3, 153.1 (Ar-C).

**<sup>29</sup>Si{<sup>1</sup>H} NMR** (C<sub>6</sub>D<sub>6</sub>, 99 MHz, 298 K): δ = -4.1.

**<sup>9</sup>Be NMR** (C<sub>6</sub>D<sub>6</sub>, 58 MHz, 298 K): δ = -3.4.

**Anal. calcd.** for C<sub>48</sub>H<sub>95</sub>Be<sub>2</sub>KN<sub>4</sub>Si<sub>2</sub>: C, 68.50%; H, 11.38%; N, 6.66%; found: C, 63.11%; H, 10.95%; N, 6.09%.

N.B. Carbon values were found to be low after running several samples, possibly due to silicon carbide formation.

## NMR and IR spectra:

L\*BeBr·Et<sub>2</sub>O, **1**  
<sup>1</sup>H NMR

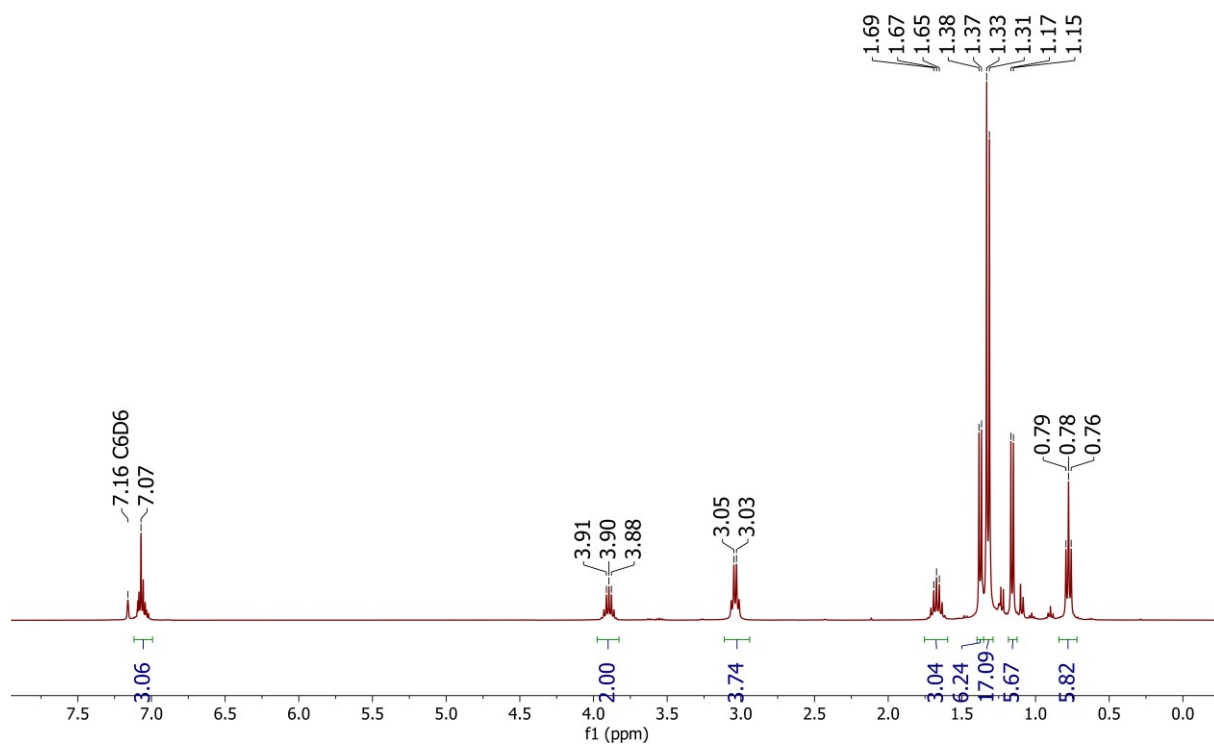

Figure S1. <sup>1</sup>H NMR spectrum of **1** in C<sub>6</sub>D<sub>6</sub> at 298K.

L\*BeBr·Et<sub>2</sub>O, **1**  
<sup>13</sup>C{<sup>1</sup>H} NMR

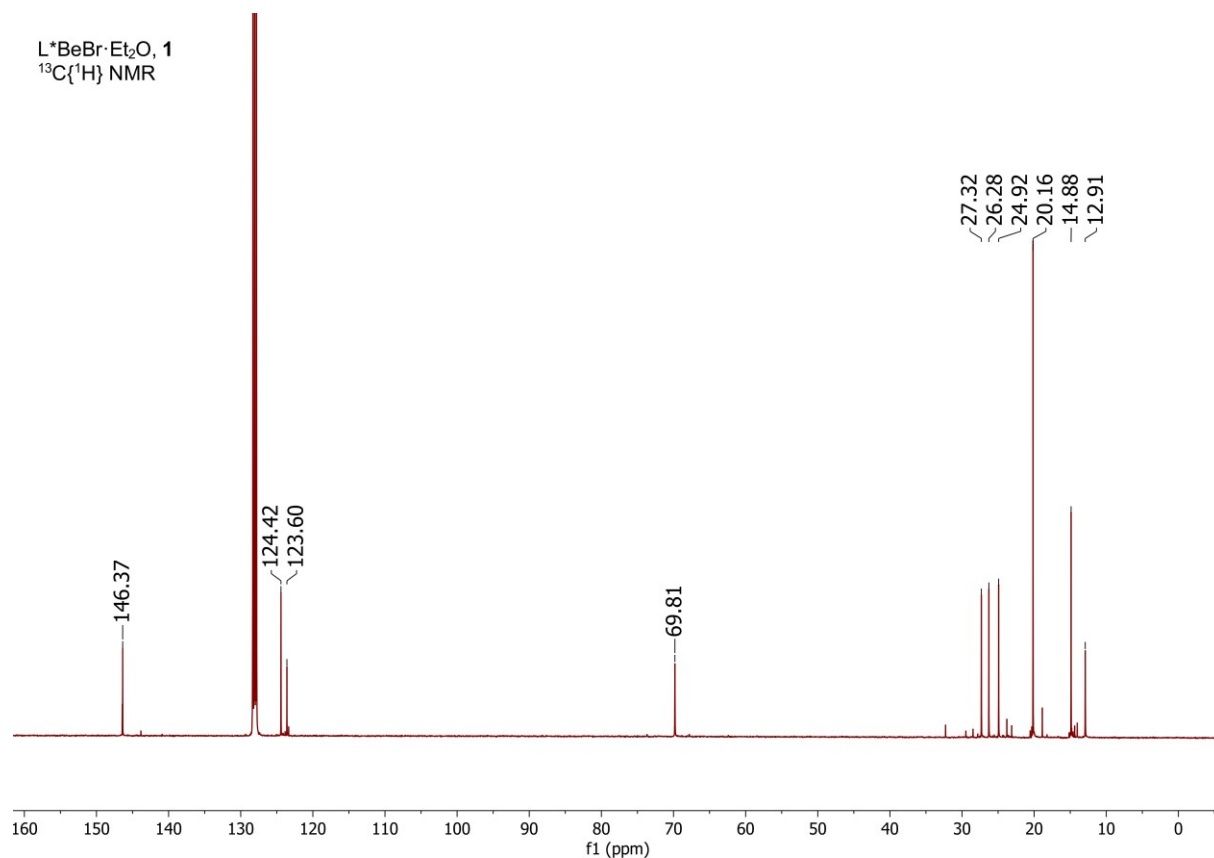

Figure S2. <sup>13</sup>C{<sup>1</sup>H} NMR spectrum of **1** in C<sub>6</sub>D<sub>6</sub> at 298K.

L\*BeBr·Et<sub>2</sub>O, **1**  
<sup>29</sup>Si NMR

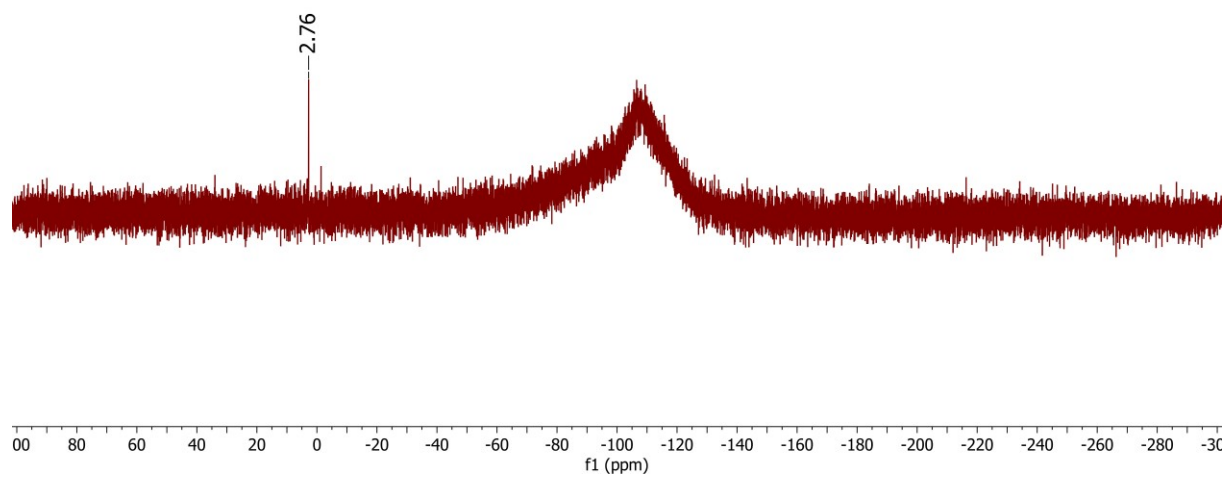

Figure S3. <sup>29</sup>Si NMR spectrum of **1** in C<sub>6</sub>D<sub>6</sub> at 298K.

L\*BeBr·Et<sub>2</sub>O, **1**  
<sup>9</sup>Be NMR

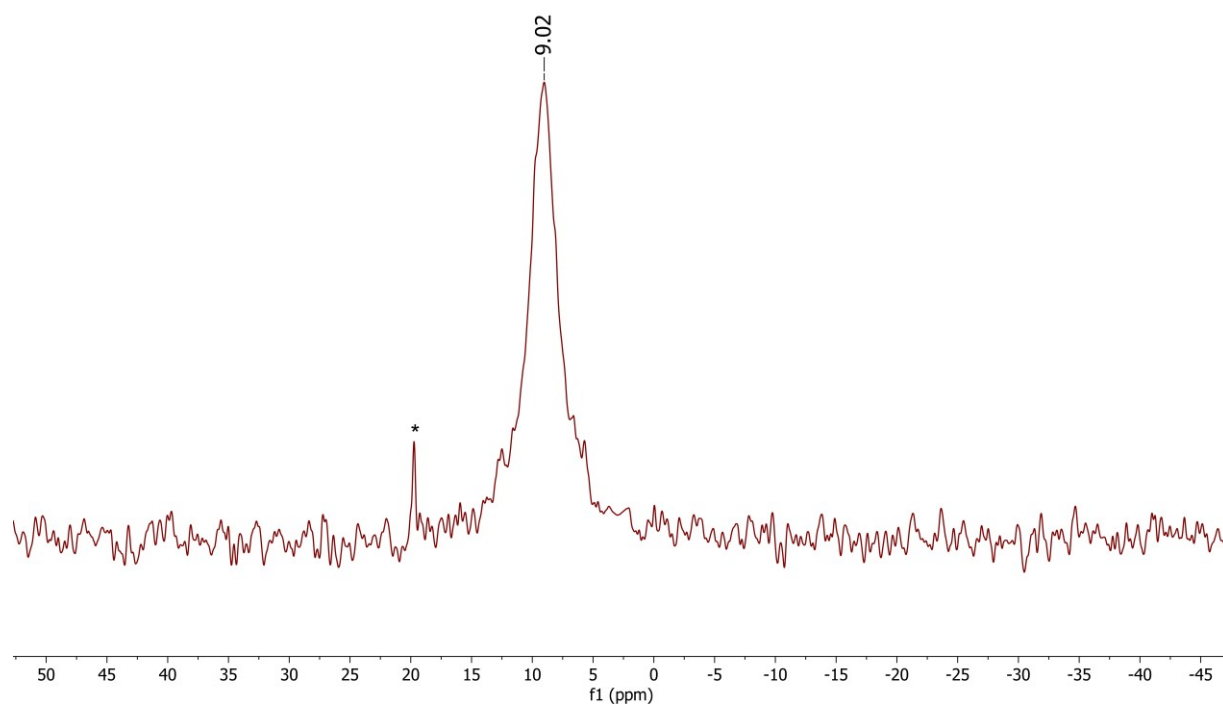

Figure S4. <sup>9</sup>Be NMR spectrum of **1** in C<sub>6</sub>D<sub>6</sub> at 298K. \*artifact of the NMR spectrometer

[L\*Be( $\mu$ -H)<sub>3</sub>BeL\*][(THF)<sub>6</sub>·Li<sub>2</sub>Br], **2a**  
<sup>1</sup>H NMR

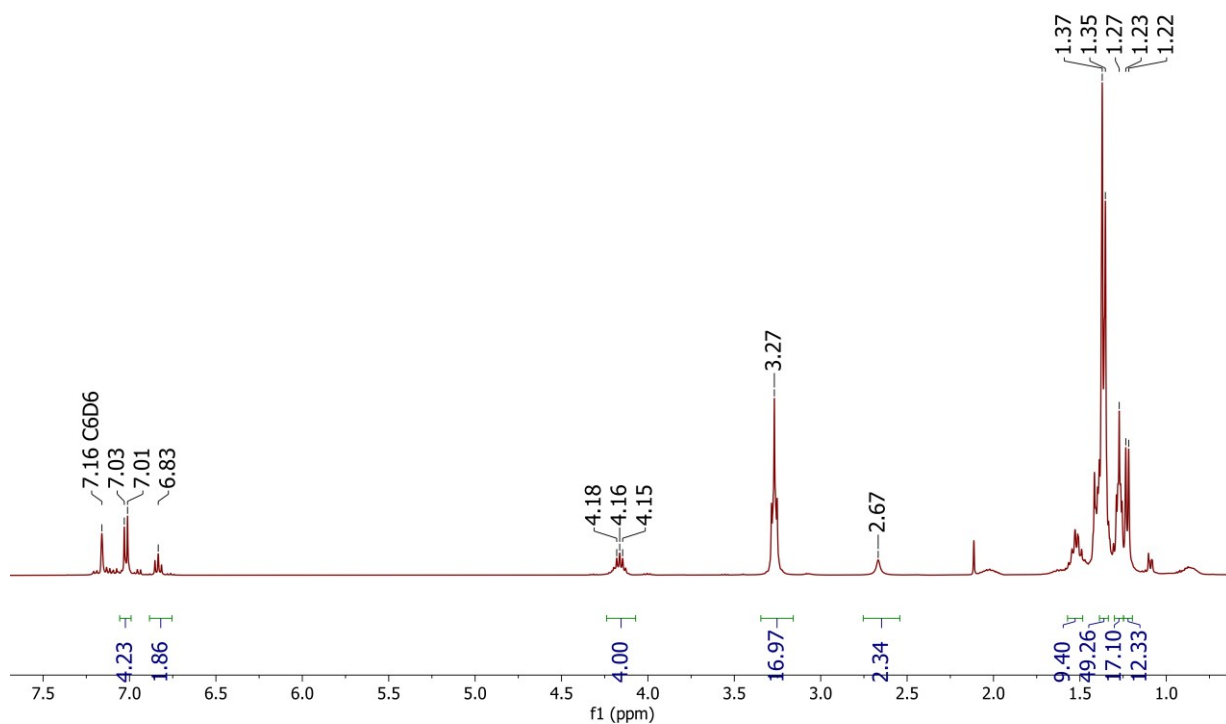

Figure S5. <sup>1</sup>H NMR spectrum of **2a** in C<sub>6</sub>D<sub>6</sub> at 298K.

[L\*Be( $\mu$ -H)<sub>3</sub>BeL\*][(THF)<sub>6</sub>·Li<sub>2</sub>Br], **2a**  
<sup>13</sup>C{<sup>1</sup>H} NMR

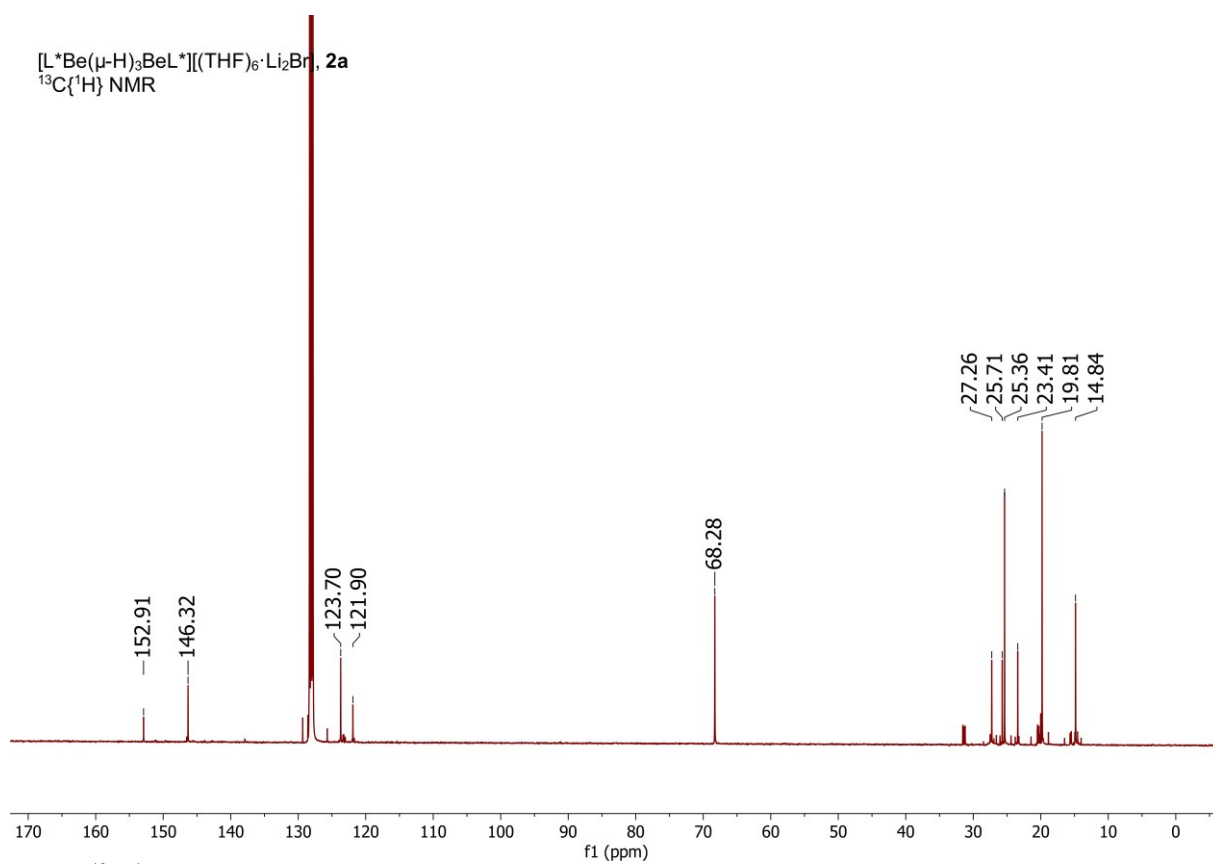

Figure S6. <sup>13</sup>C{<sup>1</sup>H} NMR spectrum of **2a** in C<sub>6</sub>D<sub>6</sub> at 298K.

[L\*Be( $\mu$ -H)<sub>3</sub>BeL\*][(THF)<sub>6</sub>·Li<sub>2</sub>Br], **2a**  
<sup>29</sup>Si NMR

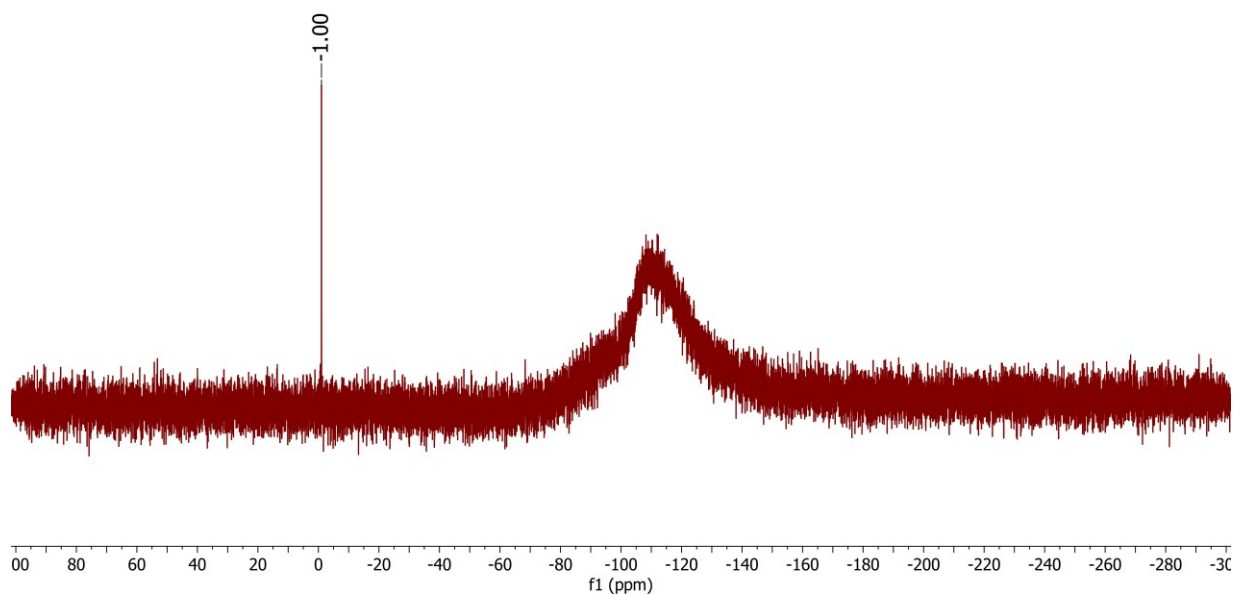

Figure S7. <sup>29</sup>Si NMR spectrum of **2a** in C<sub>6</sub>D<sub>6</sub> at 298K.

[L\*Be( $\mu$ -H)<sub>3</sub>BeL\*][(THF)<sub>6</sub>·Li<sub>2</sub>Br], **2a**  
<sup>9</sup>Be NMR

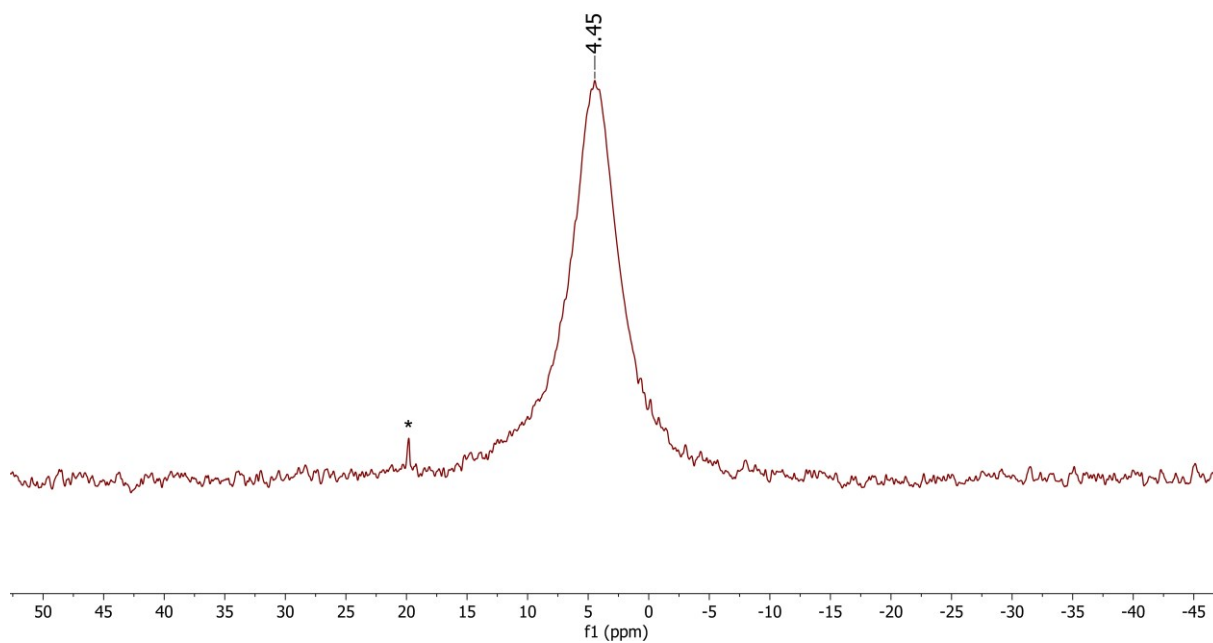

Figure S8. <sup>9</sup>Be NMR spectrum of **2a** in C<sub>6</sub>D<sub>6</sub> at 298K. \**artifact of the NMR spectrometer*



[L\*Be( $\mu$ -H)<sub>3</sub>BeL\*][(TMEDA)<sub>2</sub>·Li], **2b**  
<sup>1</sup>H NMR

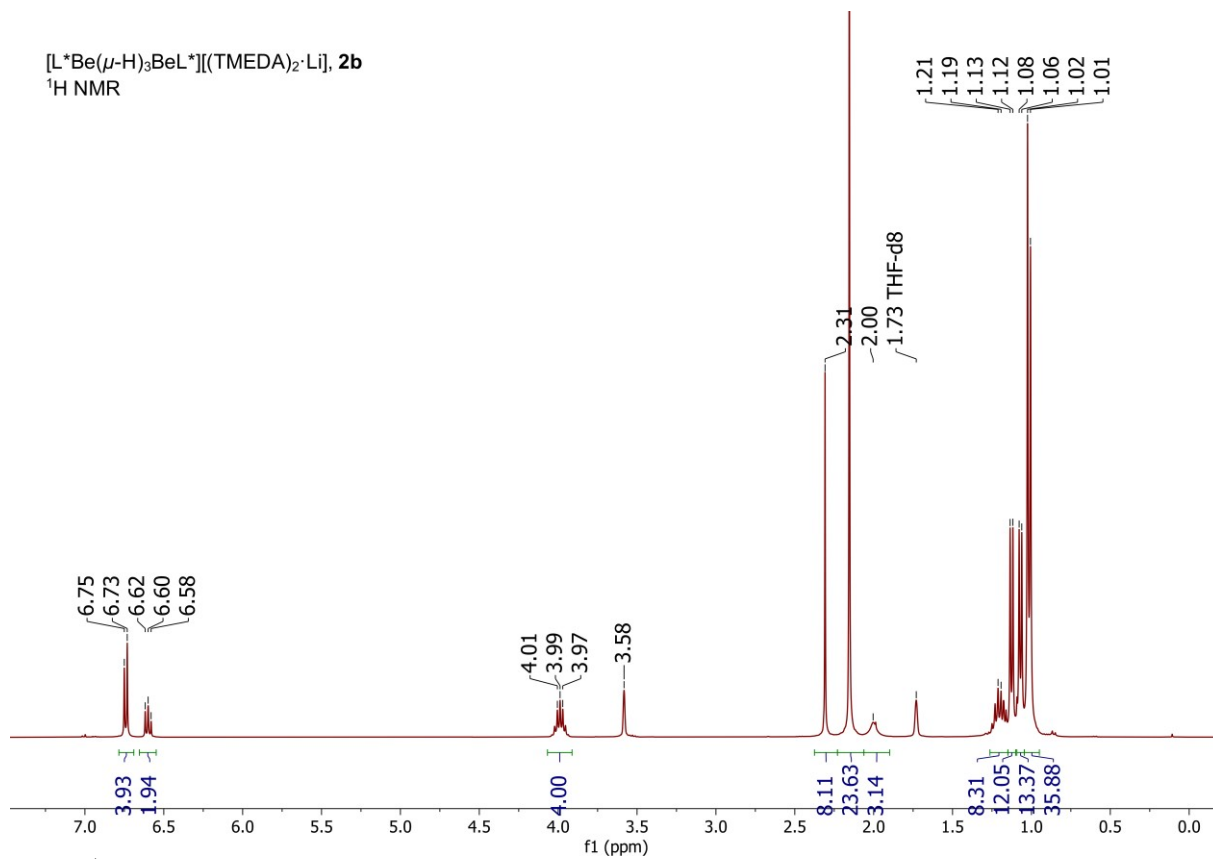

[L\*Be( $\mu$ -H)<sub>3</sub>BeL\*][(TMEDA)<sub>2</sub>·Li], **2b**  
<sup>13</sup>C{<sup>1</sup>H} NMR

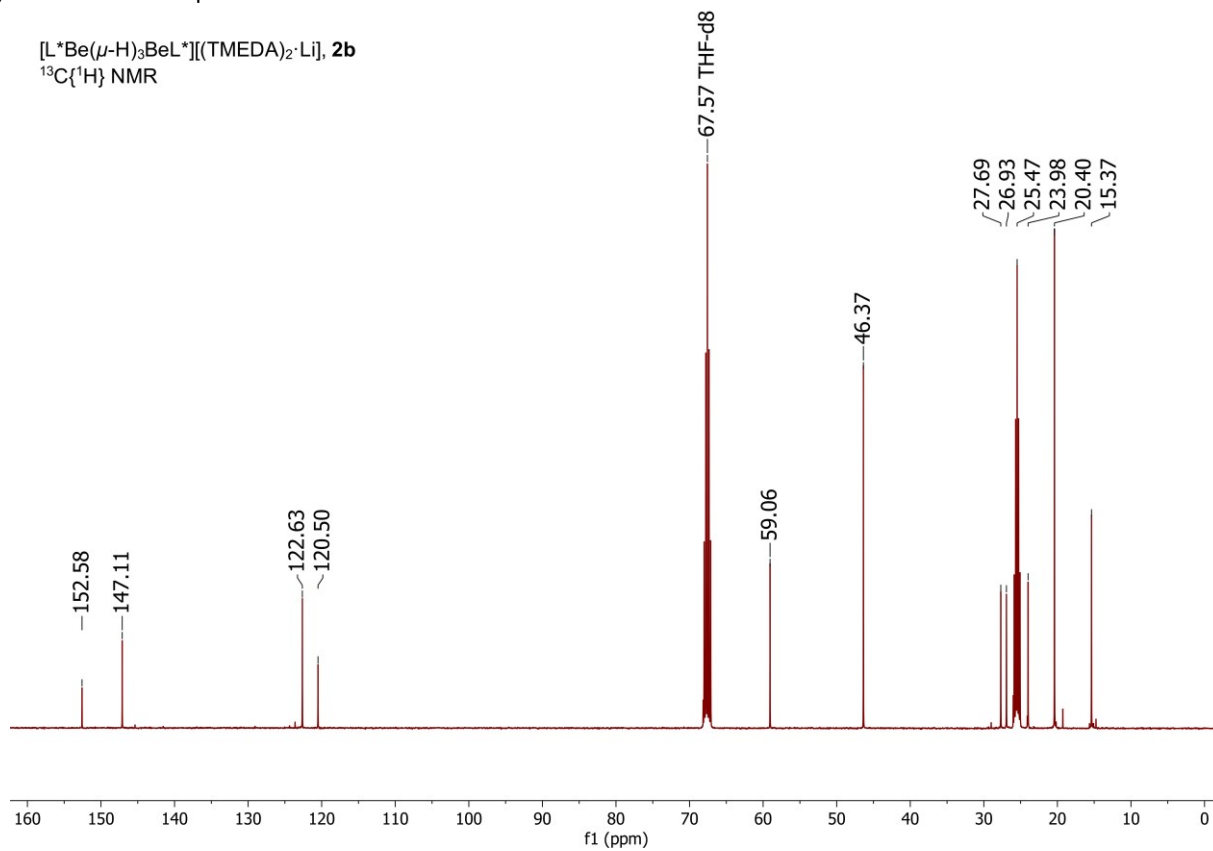

$[\text{L}^*\text{Be}(\mu\text{-H})_3\text{BeL}^*][(\text{TMEDA})_2\text{-Li}]$ , **2b**  
 $^{29}\text{Si}$  NMR

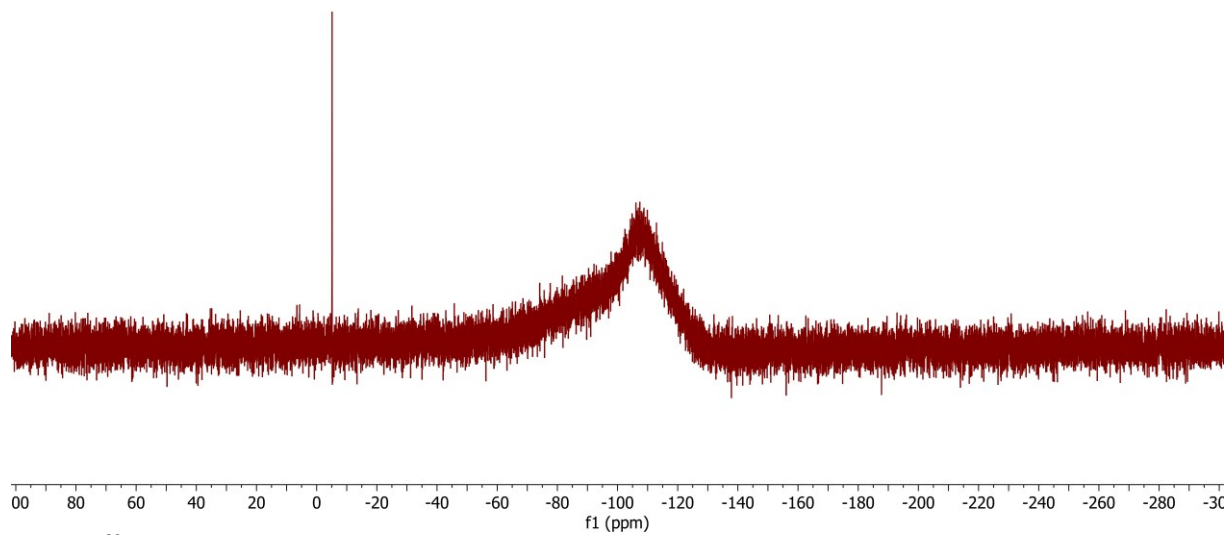

Figure S11.  $^{29}\text{Si}$  NMR spectrum of **2b** in  $\text{D}_8\text{-THF}$  at 298K.

$[\text{L}^*\text{Be}(\mu\text{-H})_3\text{BeL}^*][(\text{TMEDA})_2\text{-Li}]$ , **2b**  
 $^9\text{Be}$  NMR

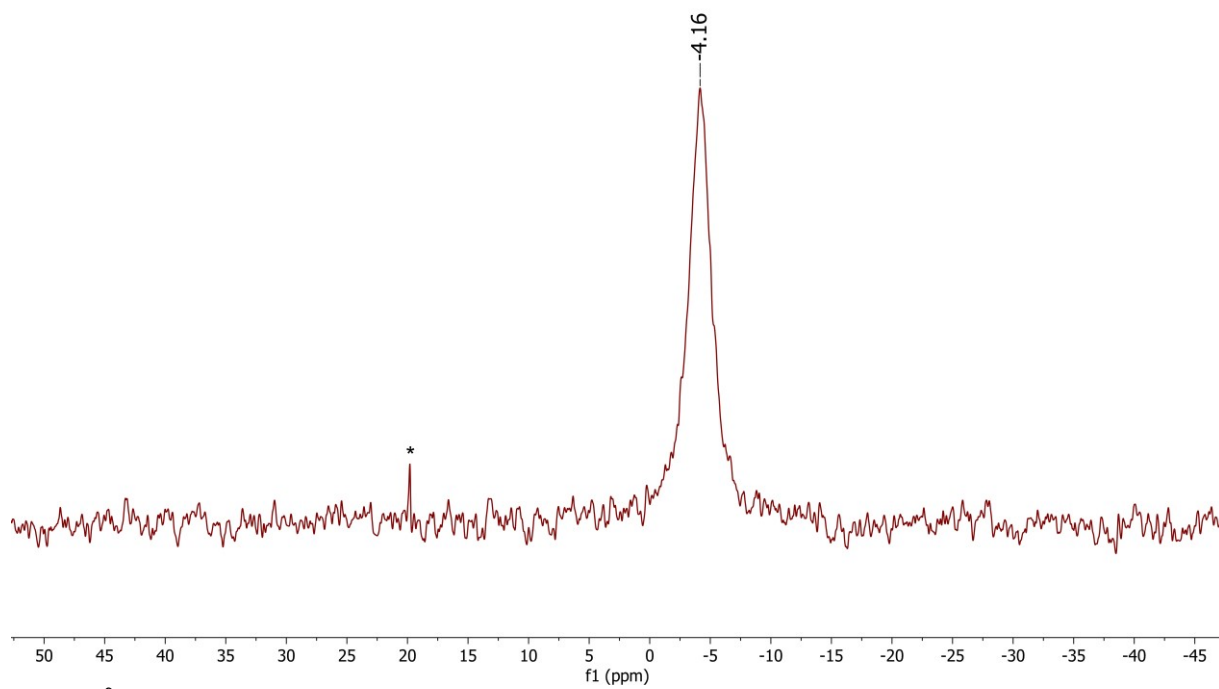

Figure S12.  $^9\text{Be}$  NMR spectrum of **2b** in  $\text{D}_8\text{-THF}$  at 298K. \**artifact of the NMR spectrometer*

[L\*Be( $\mu$ -H)<sub>3</sub>BeL\*][TMEDA·K], **3**  
<sup>1</sup>H NMR

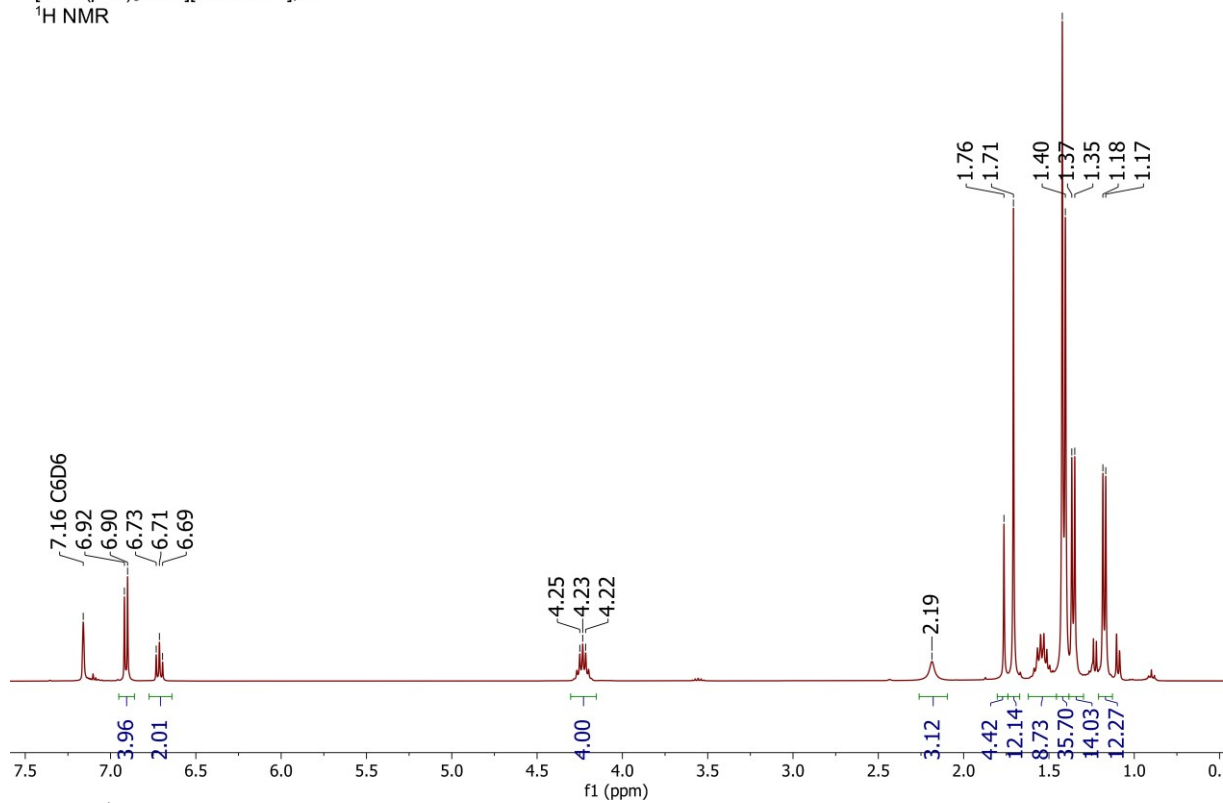

Figure S13. <sup>1</sup>H NMR spectrum of **3** in C<sub>6</sub>D<sub>6</sub> at 298K.

[L\*Be( $\mu$ -H)<sub>3</sub>BeL\*][TMEDA·K], **3**  
<sup>13</sup>C{<sup>1</sup>H} NMR

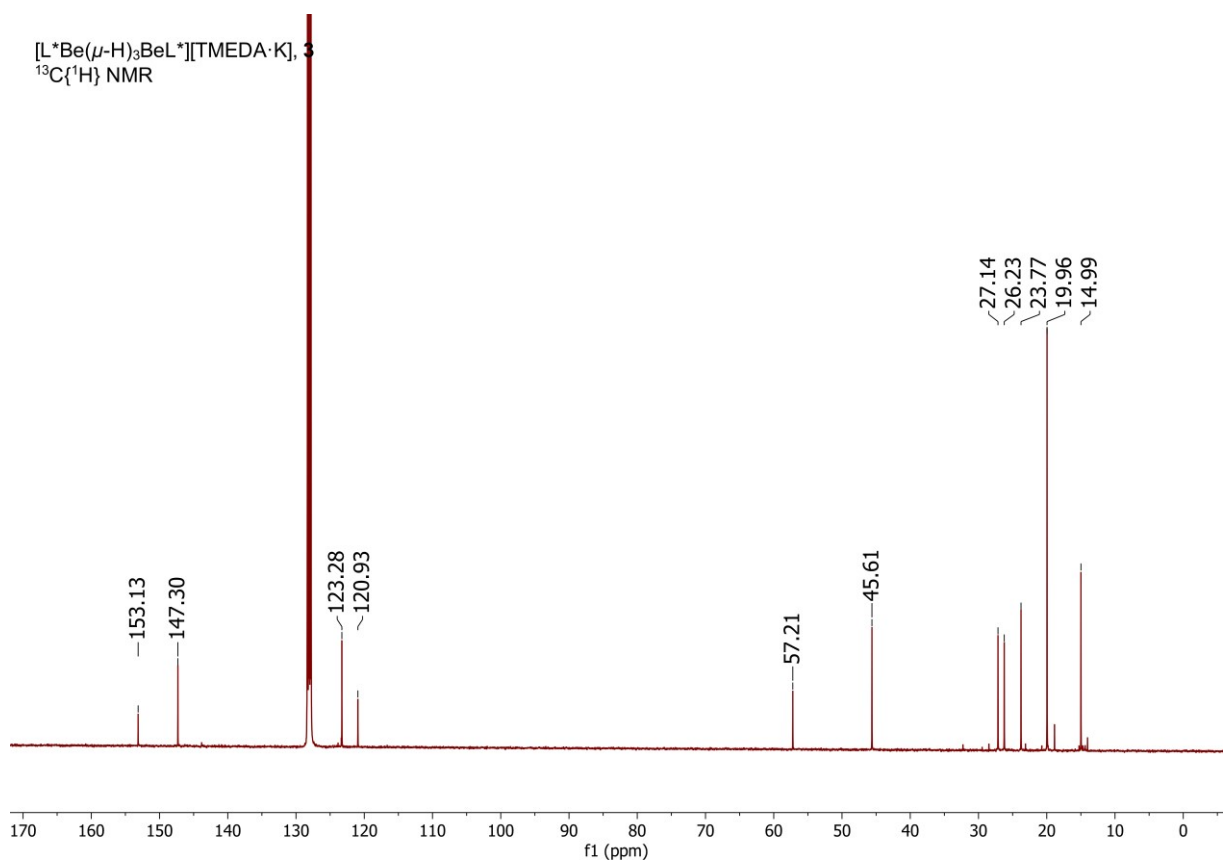

Figure S14. <sup>13</sup>C{<sup>1</sup>H} NMR spectrum of **3** in C<sub>6</sub>D<sub>6</sub> at 298K.

[L\*Be( $\mu$ -H)<sub>3</sub>BeL\*][TMEDA·K], **3**  
<sup>29</sup>Si NMR

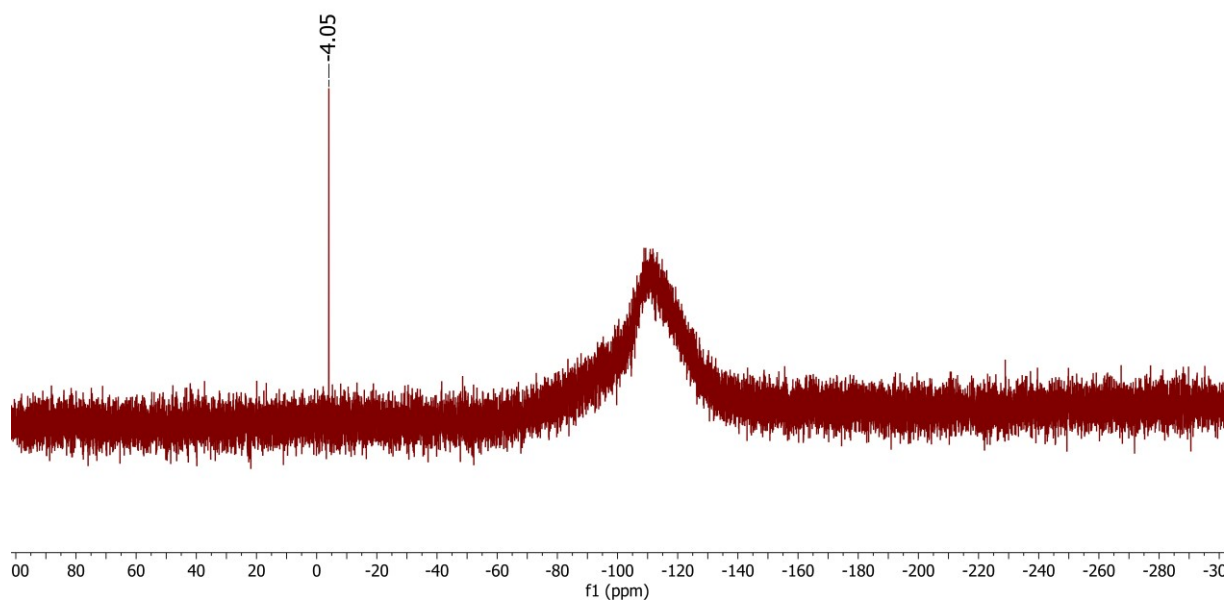

Figure S15. <sup>29</sup>Si NMR spectrum of **3** in C<sub>6</sub>D<sub>6</sub> at 298K.

[L\*Be( $\mu$ -H)<sub>3</sub>BeL\*][TMEDA·K], **3**  
<sup>9</sup>Be NMR

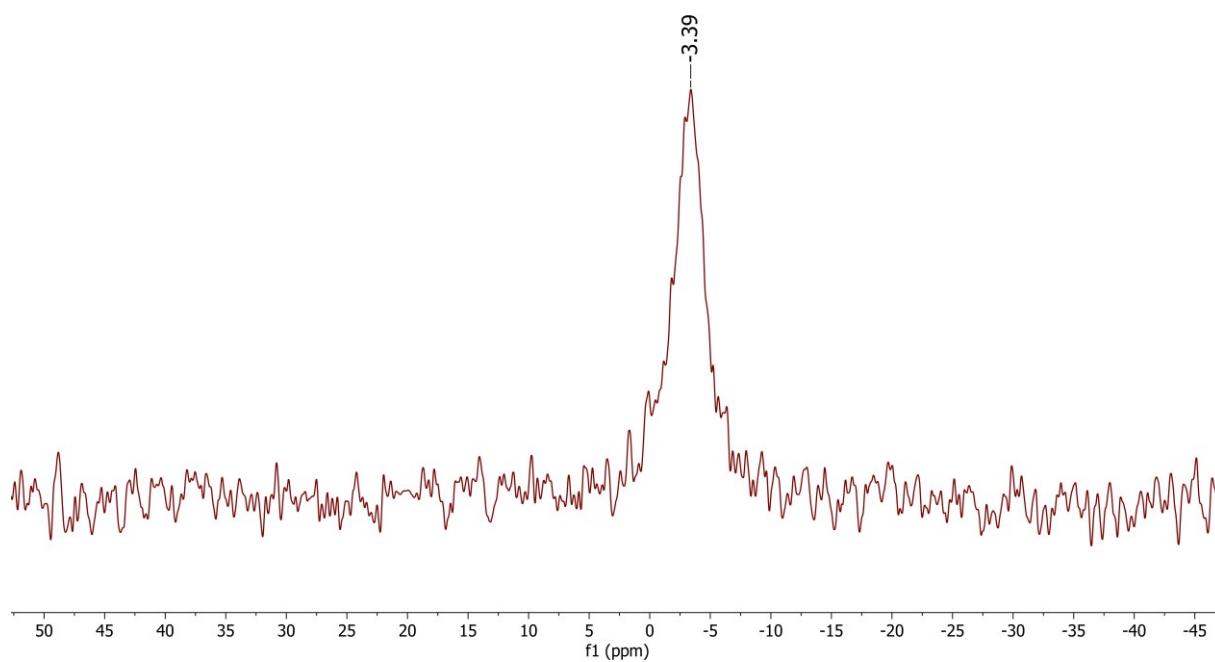

Figure S16. <sup>9</sup>Be NMR spectrum of **3** in C<sub>6</sub>D<sub>6</sub> at 298K.

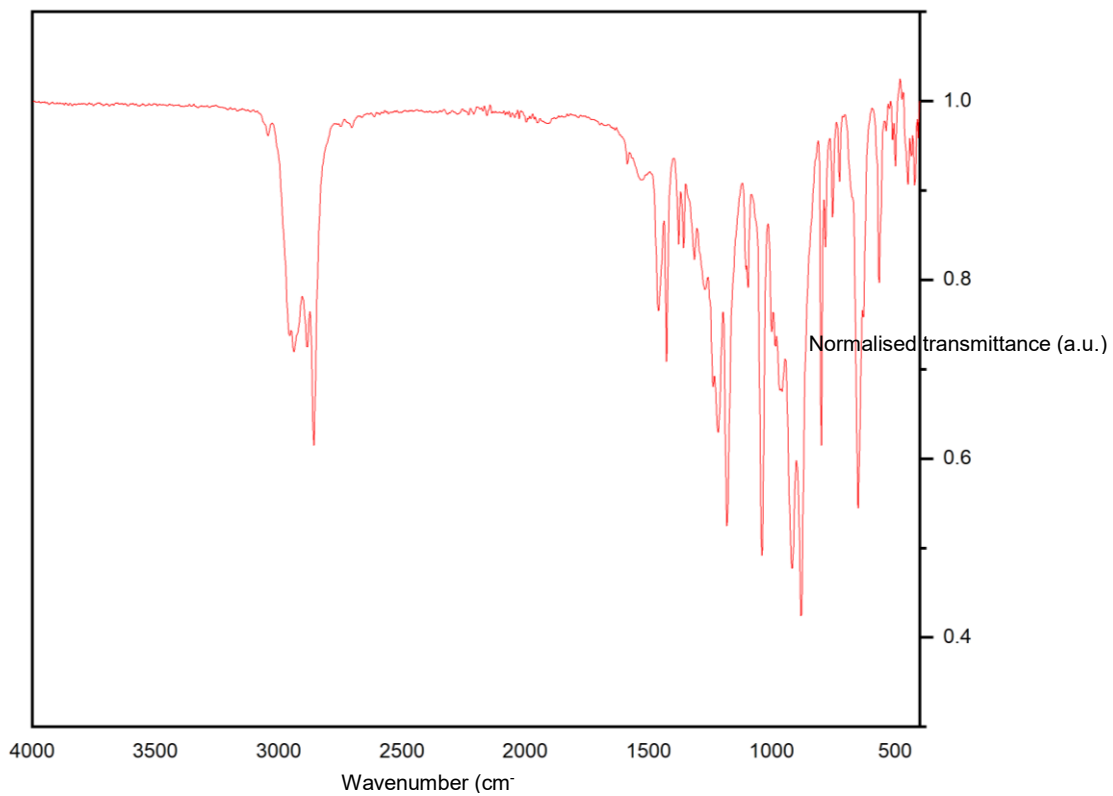

**Figure S17.** ATR-IR spectrum of compound **2a**.

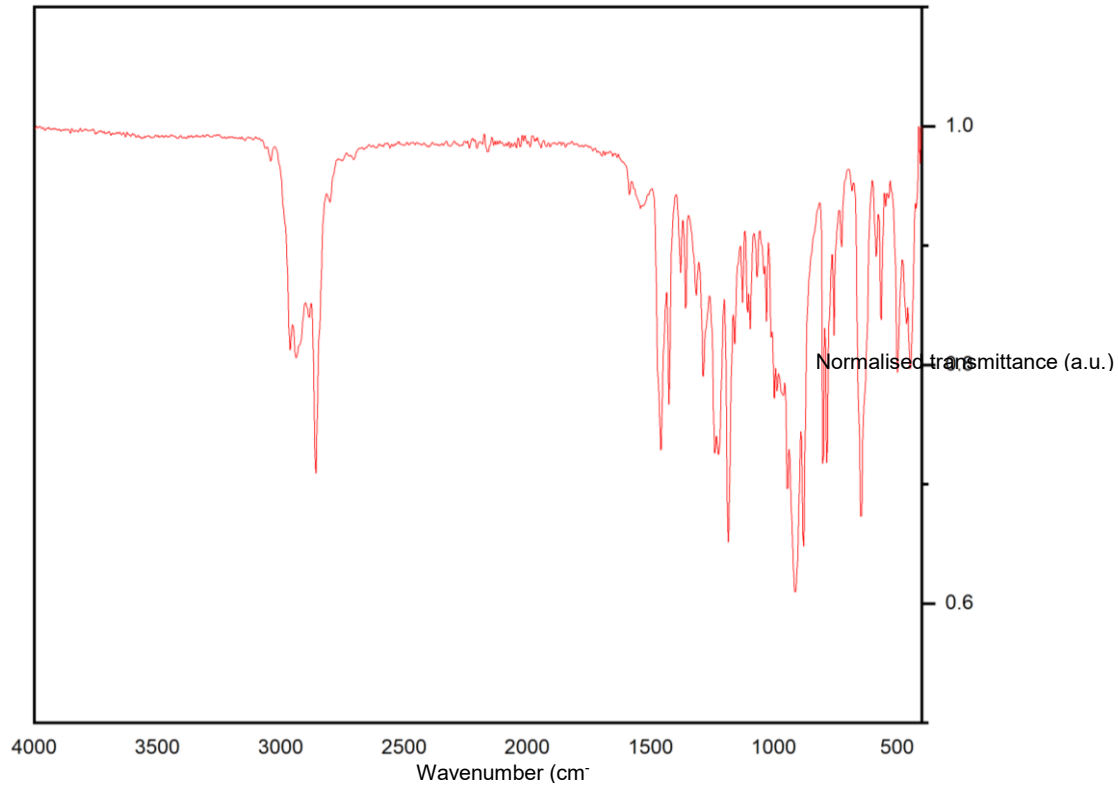

**Figure S18.** ATR-IR spectrum of compound **2b**.

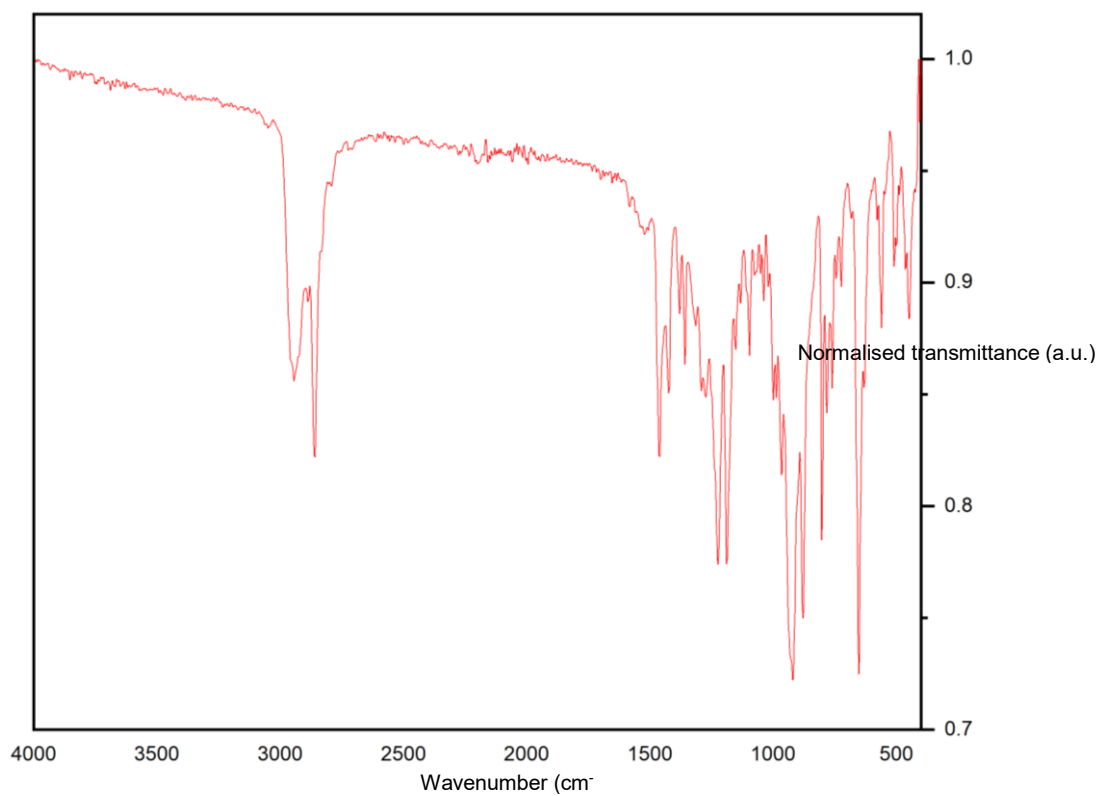

**Figure S19.** ATR-IR spectrum of compound **3**.

## 2. X-ray crystallographic details

Single crystals of **1**, **2b**, and **3** suitable for X-ray structural analysis were mounted in perfluoroalkyl ether oil on a nylon loop and positioned in a 150 K cold N<sub>2</sub> gas stream. Data collection was performed with a STOE StadiVari diffractometer (MoK $\alpha$  radiation) equipped with a DECTRIS PILATUS 300K detector. Structures were solved by Direct Methods (SHELXS-2018)<sup>6</sup> and refined by full-matrix least-squares calculations against F<sup>2</sup> (SHELXL-2018).<sup>7</sup> The positions of the hydrogen atoms, aside from those in the [Be<sub>2</sub>H<sub>3</sub>] moieties of **2b** and **3**, were calculated and refined using a riding model. All non-hydrogen atoms and the hydride ligands in **2b** and **3** were treated with anisotropic displacement parameters. Crystal data, details of data collections, and refinements for all structures can be found in their CIF files, which are available free of charge via [www.ccdc.cam.ac.uk/data\\_request/cif](http://www.ccdc.cam.ac.uk/data_request/cif), and are summarized in Table S1.

**Table S1.** Summary of X-ray crystallographic data for **1**, **2b**, and **3**.

|                                         | <b>1</b>                                                  | <b>2b</b>                                                                                                                        | <b>3</b>                                                                        |
|-----------------------------------------|-----------------------------------------------------------|----------------------------------------------------------------------------------------------------------------------------------|---------------------------------------------------------------------------------|
| empirical form.                         | C <sub>21</sub> H <sub>38</sub> BeBrNSi·Et <sub>2</sub> O | C <sub>42</sub> H <sub>79</sub> Be <sub>2</sub> N <sub>2</sub> Si <sub>2</sub> ·C <sub>12</sub> H <sub>32</sub> LiN <sub>4</sub> | C <sub>48</sub> H <sub>95</sub> Be <sub>2</sub> KN <sub>4</sub> Si <sub>2</sub> |
| formula wt                              | 495.65                                                    | 925.62                                                                                                                           | 841.57                                                                          |
| crystal syst.                           | orthorhombic                                              | triclinic                                                                                                                        | orthorhombic                                                                    |
| space group                             | <i>P2<sub>1</sub>2<sub>1</sub>2<sub>1</sub></i>           | <i>P-1</i>                                                                                                                       | <i>Pna2<sub>1</sub></i>                                                         |
| <i>a</i> (Å)                            | 10.508(2)                                                 | 13.849(3)                                                                                                                        | 26.540(5)                                                                       |
| <i>b</i> (Å)                            | 14.060(3)                                                 | 15.592(3)                                                                                                                        | 10.950(2)                                                                       |
| <i>c</i> (Å)                            | 18.959(4)                                                 | 16.930(3)                                                                                                                        | 90                                                                              |
| $\alpha$ (deg.)                         | 90                                                        | 85.77(3)                                                                                                                         | 90                                                                              |
| $\beta$ ( $\delta\epsilon\gamma$ )      | 90                                                        | 67.48(3)                                                                                                                         | 90                                                                              |
| $\gamma$ (deg.)                         | 90                                                        | 67.01(3)                                                                                                                         | 79.94(3)                                                                        |
| vol (Å <sup>3</sup> )                   | 2800.9(10)                                                | 3096.1(14)                                                                                                                       | 5588.5(19)                                                                      |
| <i>Z</i>                                | 4                                                         | 2                                                                                                                                | 4                                                                               |
| $\rho$ (calc) (g.cm <sup>-3</sup> )     | 1.175                                                     | 0.993                                                                                                                            | 1.000                                                                           |
| $\mu$ (mm <sup>-1</sup> )               | 1.526                                                     | 0.093                                                                                                                            | 0.169                                                                           |
| <i>F</i> (000)                          | 1064                                                      | 1032                                                                                                                             | 1864                                                                            |
| <i>T</i> (K)                            | 150(2)                                                    | 150(2)                                                                                                                           | 150(2)                                                                          |
| reflns collect.                         | 26524                                                     | 93689                                                                                                                            | 52410                                                                           |
| unique reflns                           | 5459                                                      | 12159                                                                                                                            | 10054                                                                           |
| <i>R</i> <sub>int</sub>                 | 0.0524                                                    | 0.0278                                                                                                                           | 0.1004                                                                          |
| R1 [ <i>I</i> >2 $\sigma$ ( <i>I</i> )] | 0.0417                                                    | 0.0460                                                                                                                           | 0.0504                                                                          |
| wR2 (all data)                          | 0.0928                                                    | 0.1293                                                                                                                           | 0.1158                                                                          |
| CCDC No.                                | 2303227                                                   | 2303228                                                                                                                          | 2303229                                                                         |

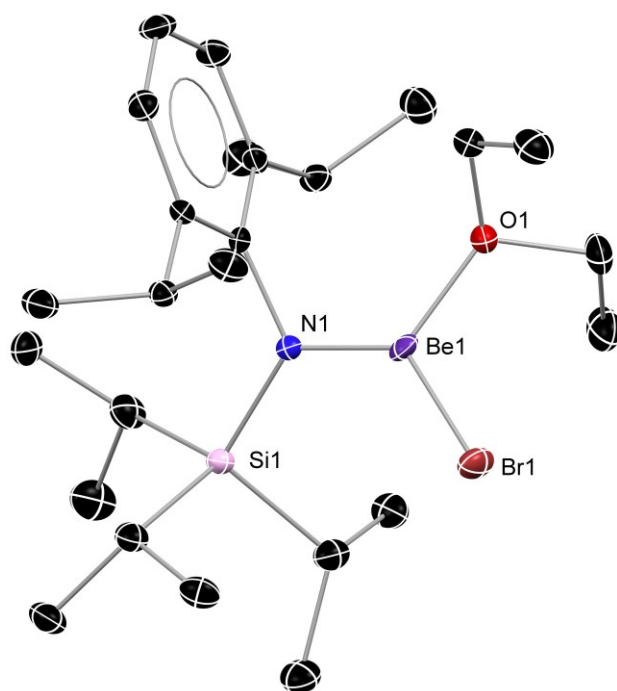

**Figure S20.** Molecular structure of **1**, with thermal ellipsoids at 30% probability, and hydrogen atoms omitted. Selected bond lengths (Å) and angles (°): Be1-N1 1.565(7); Be1-Br1 2.088(6); Be1-O1 1.565(7); Br1-Be1-O1 109.3(3); N1-Be1-O1 120.0(4); Br1-Be1-N1 130.6(4).

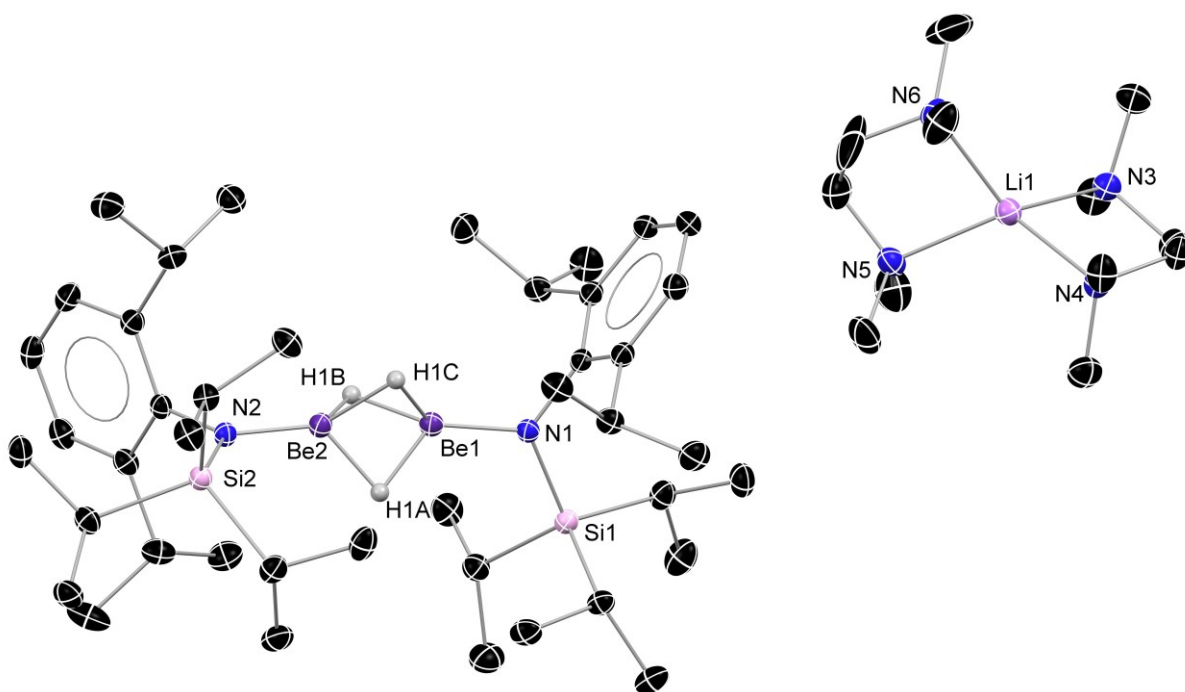

**Figure S21.** Molecular structure of **2b** including the [(TMEDA)<sub>2</sub>Li] counterion, with thermal ellipsoids at 30% probability, hydrogen atoms omitted. For metrical parameters, see the main text.



### 3. Computational methods and details

Computational experiments were performed using the Gaussian 16 program.<sup>8</sup> Geometry optimization was carried out at the B97 or B3LYP level, with the def2-TZVP basis set for Be, N, and Si, and the def2-SVP basis set for all other atoms.<sup>9</sup> Stationary points were confirmed as true minima by vibrational frequency analysis (no negative eigenvalues). Dispersion corrections were implemented with Grimme's D3 model.<sup>9(d)</sup> Solvent effects were considered using the SMD model, for THF and benzene. Hydride ion affinity was calculated for the model complex  $[(\text{Me}_3\text{Si})(\text{Xyl})\text{NBe}(\mu\text{-H})]_2$ , through isodesmic anchoring to the  $\text{Me}_3\text{SiH}/[\text{Me}_3\text{Si}]^+$  couple ( $\text{HIA}_{\text{Me}_3\text{Si}^+} = 959 \text{ kJ}\cdot\text{mol}^{-1}$ ),<sup>10</sup> with geometry optimization at the B3LYP level, using the def2-TZVP basis set for Be, N, and Si, and the def2-SVP basis set for all other atoms. The QTAIM and Mayer Bond Order analysis were executed using the Multiwfn program.<sup>11</sup>

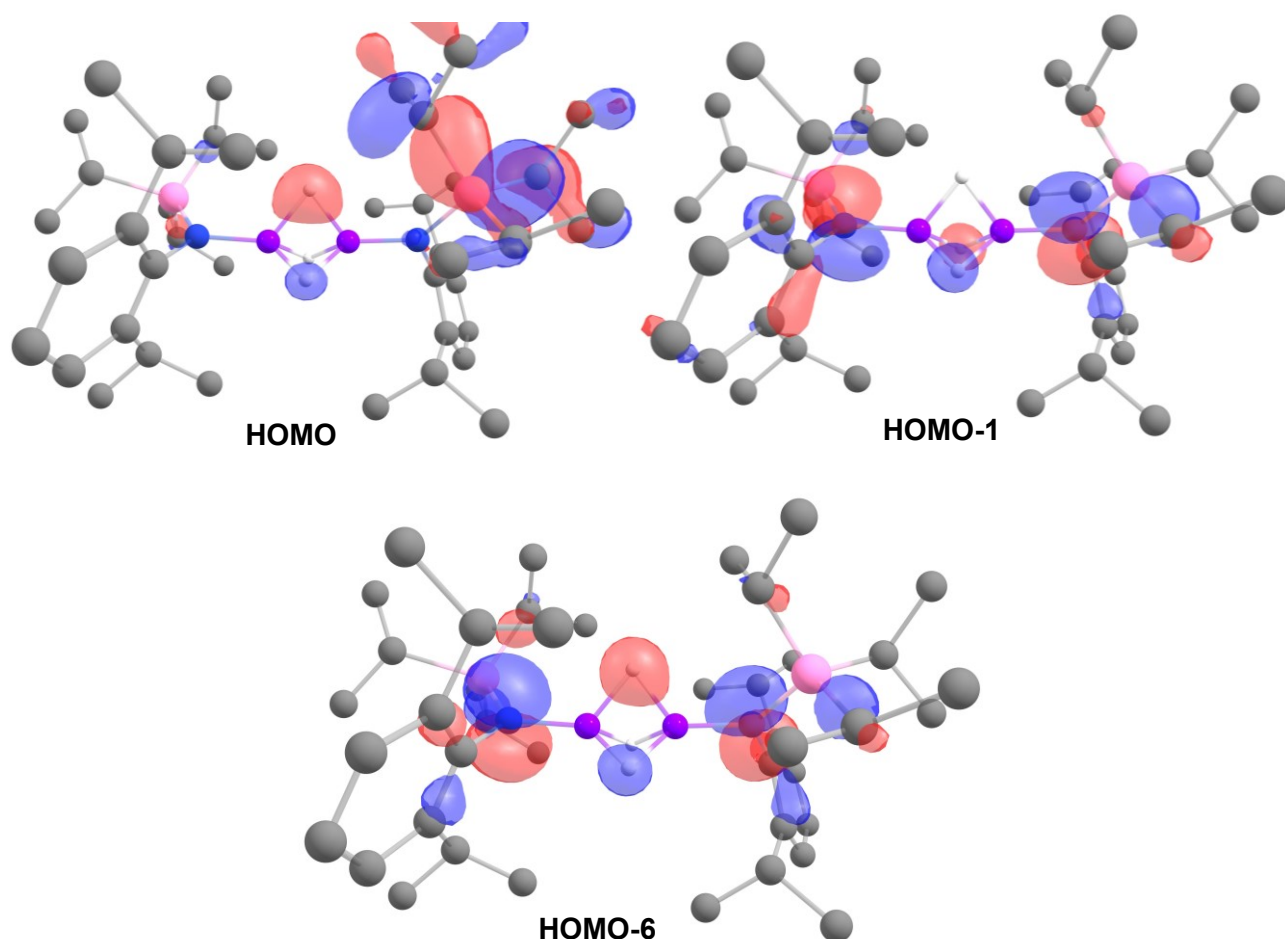

**Figure S22.** Selected frontier orbitals for calculated anion 2.

**Table S2.** Selected Mayer Bond Order values for **2**

| Element centres    |       | Mayer Bond Order |
|--------------------|-------|------------------|
| Be123              | Be124 | 0.532            |
| Be123              | H125  | 0.508            |
| Be123              | H126  | 0.282            |
| Be123              | H127  | 0.428            |
| Be124              | H125  | 0.414            |
| Be124              | H126  | 0.654            |
| Be124              | H127  | 0.521            |
| <b>Mean (Be-H)</b> |       | <b>0.468</b>     |

**Table 2.** The B97D3(def2-TZVP//def2-SVP) Cartesian coordinates for anion **2** in the gas phase.

| Atom | x-Coordinate | y-Coordinate | z-Coordinate |
|------|--------------|--------------|--------------|
| Si   | 3.32235      | 1.21878      | -0.60456     |
| Si   | -3.43073     | -0.93874     | -1.1186      |
| N    | -2.57326     | -0.05112     | 0.09713      |
| N    | 2.4811       | -0.13623     | 0.08763      |
| C    | 3.1702       | -1.21221     | 0.70215      |
| C    | -3.72939     | 0.45607      | 2.22972      |
| C    | -3.20469     | 0.87687      | 0.96651      |
| C    | 3.58647      | 2.58743      | 0.71633      |
| H    | 4.02084      | 2.02278      | 1.5636       |
| C    | 3.43242      | -1.21612     | 2.10798      |
| C    | 3.6003       | -2.33735     | -0.07247     |
| C    | -3.3007      | 2.25994      | 0.61604      |
| C    | -2.54973     | -3.46059     | 0.05062      |
| H    | -2.84885     | -4.40063     | 0.5579       |
| H    | -2.02751     | -2.82668     | 0.78614      |
| H    | -1.80316     | -3.72801     | -0.71654     |
| C    | -5.12707     | -0.07491     | -1.40585     |
| H    | -4.88406     | 0.99993      | -1.30269     |
| C    | -3.54383     | -0.98553     | 2.68072      |
| H    | -3.45408     | -1.58362     | 1.76405      |
| C    | -3.76947     | -2.74857     | -0.56204     |
| H    | -4.51173     | -2.62782     | 0.25331      |
| C    | 4.17422      | -2.2658      | 2.67935      |
| H    | 4.37495      | -2.25286     | 3.7584       |
| C    | -4.34809     | 1.39128      | 3.07721      |
| H    | -4.74402     | 1.05973      | 4.04476      |
| C    | -3.92988     | 3.16186      | 1.49292      |
| H    | -3.99417     | 4.22135      | 1.21362      |
| C    | 3.89264      | 0.5176       | 3.93068      |
| H    | 3.45207      | 1.38075      | 4.46434      |
| H    | 4.7657       | 0.87864      | 3.35762      |
| H    | 4.26606      | -0.18843     | 4.6966       |

|   |          |          |          |
|---|----------|----------|----------|
| C | 2.20489  | 1.89245  | -2.00293 |
| H | 1.22149  | 1.97613  | -1.50117 |
| C | -5.75041 | -0.26902 | -2.79853 |
| H | -5.99574 | -1.3291  | -2.99726 |
| H | -5.08373 | 0.06886  | -3.61052 |
| H | -6.69788 | 0.30135  | -2.89163 |
| C | -2.65954 | 2.77474  | -0.66456 |
| H | -2.43191 | 1.88421  | -1.26538 |
| C | 2.85039  | -0.13536 | 3.00859  |
| H | 2.45035  | 0.64183  | 2.34175  |
| C | -2.17725 | 0.39339  | -3.36461 |
| H | -1.36088 | 0.84904  | -2.77852 |
| H | -3.03529 | 1.0881   | -3.34274 |
| H | -1.82848 | 0.32567  | -4.41524 |
| C | -4.43208 | -3.6145  | -1.64717 |
| H | -3.76308 | -3.75922 | -2.51573 |
| H | -5.36745 | -3.16573 | -2.02607 |
| H | -4.68367 | -4.62462 | -1.26242 |
| C | -4.71594 | -1.55386 | 3.49282  |
| H | -4.57127 | -2.63714 | 3.66404  |
| H | -5.67715 | -1.41585 | 2.96503  |
| H | -4.80583 | -1.07834 | 4.48789  |
| C | -4.46257 | 2.73916  | 2.7152   |
| H | -4.95271 | 3.45559  | 3.3871   |
| C | 5.03611  | 0.63858  | -1.24299 |
| H | 4.81913  | -0.33457 | -1.71905 |
| C | 4.34309  | -3.36227 | 0.53847  |
| H | 4.67602  | -4.21556 | -0.06538 |
| C | -2.52122 | -0.99913 | -2.80698 |
| H | -3.28641 | -1.44789 | -3.47529 |
| C | 5.66785  | 1.53215  | -2.32423 |
| H | 5.8644   | 2.5555   | -1.95685 |
| H | 5.02343  | 1.62278  | -3.2155  |
| H | 6.6408   | 1.11805  | -2.66176 |
| C | 3.16697  | -2.48177 | -1.52568 |
| H | 2.88522  | -1.47474 | -1.86791 |
| C | 4.26209  | -3.01428 | -2.46224 |
| H | 5.19295  | -2.42498 | -2.37481 |
| H | 3.92352  | -2.96729 | -3.51439 |
| H | 4.51389  | -4.07041 | -2.24925 |
| C | 1.65797  | -0.69259 | 3.80833  |
| H | 0.90905  | -1.13018 | 3.12821  |
| H | 1.16079  | 0.10703  | 4.38921  |
| H | 1.98352  | -1.4811  | 4.51363  |
| C | -6.15186 | -0.4019  | -0.30513 |
| H | -7.06815 | 0.21329  | -0.41657 |
| H | -5.74715 | -0.20782 | 0.70191  |
| H | -6.46719 | -1.46178 | -0.34538 |

|    |          |          |          |
|----|----------|----------|----------|
| C  | -1.27952 | -1.90574 | -2.86591 |
| H  | -0.82375 | -1.885   | -3.8771  |
| H  | -1.51553 | -2.95755 | -2.63496 |
| H  | -0.50866 | -1.57382 | -2.15283 |
| C  | 6.03477  | 0.36393  | -0.10243 |
| H  | 6.96578  | -0.09613 | -0.49307 |
| H  | 5.62095  | -0.32075 | 0.65583  |
| H  | 6.32868  | 1.2961   | 0.41463  |
| C  | 4.6524   | -3.3271  | 1.90356  |
| H  | 5.24076  | -4.13238 | 2.36207  |
| C  | 4.57944  | 3.71449  | 0.38285  |
| H  | 4.25685  | 4.31012  | -0.48953 |
| H  | 5.59009  | 3.33108  | 0.16059  |
| H  | 4.67776  | 4.41994  | 1.2343   |
| C  | 1.89708  | -3.35239 | -1.60254 |
| H  | 2.11065  | -4.38354 | -1.26152 |
| H  | 1.51072  | -3.4032  | -2.63791 |
| H  | 1.10319  | -2.93773 | -0.95925 |
| C  | 2.24042  | 3.16204  | 1.19152  |
| H  | 2.36237  | 3.78331  | 2.10204  |
| H  | 1.50711  | 2.36988  | 1.42176  |
| H  | 1.78283  | 3.8059   | 0.41869  |
| C  | 2.01854  | 0.87496  | -3.14078 |
| H  | 1.31191  | 1.25586  | -3.90546 |
| H  | 1.60316  | -0.07247 | -2.76082 |
| H  | 2.97038  | 0.64627  | -3.657   |
| C  | -2.20862 | -1.13435 | 3.43375  |
| H  | -1.3721  | -0.76848 | 2.81635  |
| H  | -2.00939 | -2.19231 | 3.69024  |
| H  | -2.21887 | -0.5462  | 4.37102  |
| C  | -1.31419 | 3.45992  | -0.36053 |
| H  | -1.4591  | 4.37124  | 0.25067  |
| H  | -0.79821 | 3.7508   | -1.29542 |
| H  | -0.65176 | 2.77713  | 0.1944   |
| C  | -3.57782 | 3.68263  | -1.49677 |
| H  | -3.79241 | 4.63999  | -0.98484 |
| H  | -4.54544 | 3.19221  | -1.70813 |
| H  | -3.10107 | 3.92841  | -2.46446 |
| C  | 2.54988  | 3.28887  | -2.54607 |
| H  | 3.54533  | 3.32542  | -3.0245  |
| H  | 2.53702  | 4.05597  | -1.75351 |
| H  | 1.81129  | 3.60219  | -3.31228 |
| Be | 0.86732  | -0.15576 | 0.16276  |
| Be | -0.95932 | -0.11093 | 0.19109  |
| H  | -0.07526 | 0.59466  | 1.16133  |
| H  | -0.03445 | 0.33431  | -0.91172 |
| H  | -0.03855 | -1.33794 | 0.34532  |

**Table 3.** The B97D3(def2-TZVP//def2-SVP) Cartesian coordinates for anion **2** with the SMD-Benzene model.

| Atom | x-Coordinate | y-Coordinate | z-Coordinate |
|------|--------------|--------------|--------------|
| Si   | 3.33472      | 1.21706      | -0.60671     |
| Si   | -3.45073     | -0.94087     | -1.11288     |
| N    | -2.57216     | -0.05131     | 0.09322      |
| N    | 2.49428      | -0.13998     | 0.09232      |
| C    | 3.18692      | -1.21724     | 0.70232      |
| C    | -3.72591     | 0.47274      | 2.22767      |
| C    | -3.19704     | 0.8845       | 0.962        |
| C    | 3.62322      | 2.57762      | 0.71759      |
| H    | 4.06568      | 2.00698      | 1.55704      |
| C    | 3.45713      | -1.2212      | 2.10766      |
| C    | 3.61197      | -2.34317     | -0.07533     |
| C    | -3.28384     | 2.26854      | 0.60714      |
| C    | -2.61666     | -3.47353     | 0.0716       |
| H    | -2.9362      | -4.37749     | 0.62954      |
| H    | -2.0398      | -2.83685     | 0.76344      |
| H    | -1.91038     | -3.80919     | -0.70717     |
| C    | -5.12831     | -0.04741     | -1.41338     |
| H    | -4.86618     | 1.02348      | -1.31735     |
| C    | -3.55829     | -0.96894     | 2.6876       |
| H    | -3.45093     | -1.56878     | 1.77447      |
| C    | -3.82471     | -2.73539     | -0.53266     |
| H    | -4.55279     | -2.58563     | 0.29037      |
| C    | 4.20345      | -2.27073     | 2.67453      |
| H    | 4.41189      | -2.25859     | 3.752        |
| C    | -4.33644     | 1.41682      | 3.07258      |
| H    | -4.73578     | 1.09214      | 4.04096      |
| C    | -3.90422     | 3.17897      | 1.48243      |
| H    | -3.96182     | 4.23782      | 1.20011      |
| C    | 3.90403      | 0.50018      | 3.95141      |
| H    | 3.46111      | 1.36716      | 4.47725      |
| H    | 4.79204      | 0.85679      | 3.3985       |
| H    | 4.25777      | -0.20628     | 4.72623      |
| C    | 2.19181      | 1.89998      | -1.9801      |
| H    | 1.21902      | 1.98856      | -1.4581      |
| C    | -5.75023     | -0.23649     | -2.80719     |
| H    | -6.01591     | -1.29165     | -3.00617     |
| H    | -5.07835     | 0.08928      | -3.6202      |
| H    | -6.68667     | 0.35098      | -2.90576     |
| C    | -2.64346     | 2.77718      | -0.67712     |
| H    | -2.44327     | 1.88572      | -1.28655     |
| C    | 2.87335      | -0.14274     | 3.01076      |
| H    | 2.48448      | 0.64009      | 2.34394      |
| C    | -2.16461     | 0.34198      | -3.36994     |
| H    | -1.3334      | 0.7847       | -2.7947      |
| H    | -3.00472     | 1.0585       | -3.35186     |

|   |          |          |          |
|---|----------|----------|----------|
| H | -1.82415 | 0.25872  | -4.42245 |
| C | -4.52384 | -3.59817 | -1.59664 |
| H | -3.87106 | -3.78016 | -2.47096 |
| H | -5.45129 | -3.13157 | -1.97337 |
| H | -4.80155 | -4.59398 | -1.19295 |
| C | -4.75023 | -1.5304  | 3.47481  |
| H | -4.61941 | -2.61629 | 3.64197  |
| H | -5.7022  | -1.38418 | 2.93201  |
| H | -4.85619 | -1.06275 | 4.47204  |
| C | -4.43886 | 2.76469  | 2.70706  |
| H | -4.92268 | 3.48718  | 3.37689  |
| C | 5.03437  | 0.63543  | -1.27813 |
| H | 4.8068   | -0.33415 | -1.75641 |
| C | 4.35848  | -3.36861 | 0.53175  |
| H | 4.6893   | -4.22186 | -0.07308 |
| C | -2.53883 | -1.03666 | -2.79867 |
| H | -3.31242 | -1.47466 | -3.464   |
| C | 5.65234  | 1.53127  | -2.36528 |
| H | 5.86597  | 2.55123  | -1.99786 |
| H | 4.99648  | 1.63109  | -3.24741 |
| H | 6.61571  | 1.11186  | -2.723   |
| C | 3.17354  | -2.48698 | -1.52811 |
| H | 2.90115  | -1.47801 | -1.87303 |
| C | 4.25879  | -3.03571 | -2.46598 |
| H | 5.20344  | -2.46871 | -2.37554 |
| H | 3.92458  | -2.97298 | -3.5189  |
| H | 4.48819  | -4.09899 | -2.26388 |
| C | 1.66904  | -0.7006  | 3.79158  |
| H | 0.93456  | -1.1475  | 3.1015   |
| H | 1.15608  | 0.09905  | 4.35894  |
| H | 1.98155  | -1.48395 | 4.50871  |
| C | -6.16414 | -0.34716 | -0.3157  |
| H | -7.06051 | 0.2975   | -0.42342 |
| H | -5.75754 | -0.1712  | 0.69422  |
| H | -6.51534 | -1.39558 | -0.35927 |
| C | -1.31761 | -1.97127 | -2.84981 |
| H | -0.84995 | -1.95462 | -3.85587 |
| H | -1.57916 | -3.02037 | -2.63319 |
| H | -0.54477 | -1.66495 | -2.12768 |
| C | 6.05283  | 0.35226  | -0.15804 |
| H | 6.96941  | -0.12271 | -0.56489 |
| H | 5.64967  | -0.32511 | 0.61298  |
| H | 6.37237  | 1.28071  | 0.35045  |
| C | 4.6754   | -3.33308 | 1.89547  |
| H | 5.26668  | -4.13819 | 2.35032  |
| C | 4.61796  | 3.701    | 0.37801  |
| H | 4.28776  | 4.30977  | -0.48263 |
| H | 5.62433  | 3.3165   | 0.13884  |

|    |          |          |          |
|----|----------|----------|----------|
| H  | 4.73475  | 4.39795  | 1.23423  |
| C  | 1.89399  | -3.34285 | -1.60015 |
| H  | 2.09451  | -4.37863 | -1.26477 |
| H  | 1.49983  | -3.38683 | -2.63296 |
| H  | 1.10773  | -2.92433 | -0.94937 |
| C  | 2.28875  | 3.15951  | 1.21548  |
| H  | 2.42598  | 3.76482  | 2.13482  |
| H  | 1.54944  | 2.37245  | 1.44487  |
| H  | 1.82793  | 3.82141  | 0.45959  |
| C  | 1.98215  | 0.89108  | -3.12108 |
| H  | 1.24983  | 1.27013  | -3.86232 |
| H  | 1.59143  | -0.0685  | -2.74443 |
| H  | 2.92023  | 0.6813   | -3.66987 |
| C  | -2.24037 | -1.12285 | 3.46937  |
| H  | -1.39035 | -0.76131 | 2.86827  |
| H  | -2.04882 | -2.1813  | 3.73024  |
| H  | -2.26358 | -0.53565 | 4.40724  |
| C  | -1.27927 | 3.42632  | -0.37885 |
| H  | -1.3957  | 4.34217  | 0.23209  |
| H  | -0.75852 | 3.7046   | -1.31485 |
| H  | -0.63394 | 2.72763  | 0.17736  |
| C  | -3.54297 | 3.71548  | -1.49503 |
| H  | -3.71809 | 4.68075  | -0.98294 |
| H  | -4.53075 | 3.26098  | -1.69484 |
| H  | -3.0732  | 3.94685  | -2.46982 |
| C  | 2.52903  | 3.29737  | -2.52496 |
| H  | 3.51374  | 3.335    | -3.02508 |
| H  | 2.53267  | 4.0647   | -1.73249 |
| H  | 1.77624  | 3.61539  | -3.27562 |
| Be | 0.88021  | -0.16733 | 0.1675   |
| Be | -0.95822 | -0.11996 | 0.18677  |
| H  | -0.0683  | 0.63529  | 1.12134  |
| H  | -0.02771 | 0.25852  | -0.93432 |
| H  | -0.02791 | -1.34137 | 0.41688  |

**Table 4.** The B97D3(def2-TZVP//def2-SVP) Cartesian coordinates for anion **2** with the SMD-THF model.

| Atom | x-Coordinate | y-Coordinate | z-Coordinate |
|------|--------------|--------------|--------------|
| Si   | 3.35775      | 1.20229      | -0.60426     |
| Si   | -3.49229     | -0.98851     | -1.06896     |
| N    | -2.58092     | -0.05548     | 0.08177      |
| N    | 2.49376      | -0.15296     | 0.0768       |
| C    | 3.16748      | -1.22806     | 0.71013      |
| C    | -3.71561     | 0.60739      | 2.18748      |
| C    | -3.17051     | 0.9414       | 0.90458      |
| C    | 3.62563      | 2.55742      | 0.72747      |

|   |          |          |          |
|---|----------|----------|----------|
| H | 4.04616  | 1.98285  | 1.57557  |
| C | 3.3885   | -1.23319 | 2.12452  |
| C | 3.62225  | -2.35284 | -0.05388 |
| C | -3.20137 | 2.31115  | 0.48899  |
| C | -2.63025 | -3.45908 | 0.21894  |
| H | -2.93234 | -4.38808 | 0.74486  |
| H | -2.11886 | -2.81198 | 0.95138  |
| H | -1.87507 | -3.74481 | -0.53387 |
| C | -5.17615 | -0.10699 | -1.35806 |
| H | -4.91631 | 0.9676   | -1.29776 |
| C | -3.60313 | -0.81839 | 2.7111   |
| H | -3.5849  | -1.47004 | 1.82718  |
| C | -3.84425 | -2.76289 | -0.42046 |
| H | -4.58214 | -2.59938 | 0.3911   |
| C | 4.11412  | -2.28408 | 2.71699  |
| H | 4.28493  | -2.27198 | 3.80107  |
| C | -4.29282 | 1.61111  | 2.98652  |
| H | -4.70694 | 1.34668  | 3.96673  |
| C | -3.79106 | 3.28326  | 1.31959  |
| H | -3.80851 | 4.32958  | 0.98841  |
| C | 3.79928  | 0.50051  | 3.96231  |
| H | 3.34511  | 1.36764  | 4.47803  |
| H | 4.69275  | 0.85923  | 3.4196   |
| H | 4.14434  | -0.20274 | 4.74365  |
| C | 2.24056  | 1.88377  | -1.99774 |
| H | 1.25786  | 1.96823  | -1.49425 |
| C | -5.82471 | -0.34079 | -2.73305 |
| H | -6.09061 | -1.40268 | -2.89105 |
| H | -5.16972 | -0.03958 | -3.56881 |
| H | -6.7645  | 0.24107  | -2.83071 |
| C | -2.5442  | 2.74334  | -0.8149  |
| H | -2.2919  | 1.81646  | -1.34717 |
| C | 2.78452  | -0.15077 | 3.00974  |
| H | 2.4056   | 0.6268   | 2.33122  |
| C | -2.27515 | 0.2116   | -3.40878 |
| H | -1.4217  | 0.67994  | -2.88755 |
| H | -3.11504 | 0.92746  | -3.38186 |
| H | -1.97878 | 0.08858  | -4.47063 |
| C | -4.52083 | -3.67074 | -1.46185 |
| H | -3.85291 | -3.88191 | -2.31751 |
| H | -5.44446 | -3.22387 | -1.87073 |
| H | -4.79942 | -4.65132 | -1.02342 |
| C | -4.77245 | -1.26991 | 3.59601  |
| H | -4.6908  | -2.35218 | 3.80975  |
| H | -5.74711 | -1.09495 | 3.10455  |
| H | -4.78796 | -0.74944 | 4.57195  |
| C | -4.34441 | 2.94509  | 2.55959  |
| H | -4.8032  | 3.71437  | 3.19395  |



|   |          |          |          |
|---|----------|----------|----------|
| C | 5.06693  | 0.61543  | -1.24301 |
| H | 4.84869  | -0.35082 | -1.73195 |
| C | 4.34676  | -3.37946 | 0.57845  |
| H | 4.70066  | -4.23125 | -0.01511 |
| C | -2.6212  | -1.14486 | -2.77053 |
| H | -3.40779 | -1.61567 | -3.39655 |
| C | 5.70732  | 1.51637  | -2.31311 |
| H | 5.91468  | 2.53384  | -1.93597 |
| H | 5.06763  | 1.62066  | -3.20641 |
| H | 6.67652  | 1.09664  | -2.65392 |
| C | 3.24398  | -2.48939 | -1.52404 |
| H | 3.00775  | -1.47593 | -1.88123 |
| C | 4.35674  | -3.06155 | -2.41391 |
| H | 5.30653  | -2.51073 | -2.285   |
| H | 4.06754  | -2.99496 | -3.47964 |
| H | 4.5568   | -4.12805 | -2.19934 |
| C | 1.57129  | -0.70606 | 3.77917  |
| H | 0.84876  | -1.16971 | 3.08687  |
| H | 1.04573  | 0.09856  | 4.32761  |
| H | 1.87867  | -1.47532 | 4.51346  |
| C | -6.19089 | -0.38213 | -0.23436 |
| H | -7.09206 | 0.25534  | -0.34393 |
| H | -5.76923 | -0.18052 | 0.76448  |
| H | -6.53736 | -1.43278 | -0.24558 |
| C | -1.39402 | -2.07125 | -2.81442 |
| H | -0.96286 | -2.10836 | -3.8363  |
| H | -1.63521 | -3.10786 | -2.52603 |
| H | -0.59882 | -1.71507 | -2.14037 |
| C | 6.06228  | 0.32657  | -0.10349 |
| H | 6.98172  | -0.15797 | -0.49189 |
| H | 5.63862  | -0.34328 | 0.6636   |
| H | 6.38026  | 1.25418  | 0.40712  |
| C | 4.61414  | -3.34581 | 1.95373  |
| H | 5.18852  | -4.15161 | 2.42852  |
| C | 4.63481  | 3.67351  | 0.40638  |
| H | 4.3248   | 4.28142  | -0.46235 |
| H | 5.64284  | 3.28139  | 0.18861  |
| H | 4.73776  | 4.37115  | 1.26365  |
| C | 1.95101  | -3.31754 | -1.65173 |
| H | 2.1164   | -4.35912 | -1.31515 |
| H | 1.59821  | -3.34845 | -2.69991 |
| H | 1.14759  | -2.88612 | -1.03102 |
| C | 2.287    | 3.15283  | 1.19721  |
| H | 2.40975  | 3.74849  | 2.1248   |
| H | 1.53074  | 2.37513  | 1.40088  |
| H | 1.85747  | 3.82807  | 0.4347   |
| C | 2.05685  | 0.87897  | -3.1469  |
| H | 1.33127  | 1.25541  | -3.89654 |

|    |          |          |          |
|----|----------|----------|----------|
| H  | 1.67281  | -0.08868 | -2.78259 |
| H  | 3.00521  | 0.68345  | -3.68266 |
| C  | -2.2531  | -1.0099  | 3.4271   |
| H  | -1.4168  | -0.73736 | 2.7629   |
| H  | -2.11116 | -2.06137 | 3.74145  |
| H  | -2.18986 | -0.37081 | 4.32851  |
| C  | -1.22012 | 3.48019  | -0.54034 |
| H  | -1.39318 | 4.43904  | -0.01494 |
| H  | -0.68796 | 3.7028   | -1.48453 |
| H  | -0.556   | 2.86427  | 0.08728  |
| C  | -3.46515 | 3.57282  | -1.72276 |
| H  | -3.71122 | 4.55598  | -1.27863 |
| H  | -4.41752 | 3.04875  | -1.92237 |
| H  | -2.97563 | 3.76708  | -2.69583 |
| C  | 2.58637  | 3.28385  | -2.52997 |
| H  | 3.57905  | 3.32096  | -3.01385 |
| H  | 2.57939  | 4.046    | -1.7326  |
| H  | 1.84613  | 3.6064   | -3.291   |
| Be | 0.88134  | -0.16885 | 0.13317  |
| Be | -0.96754 | -0.12986 | 0.15041  |
| H  | -0.07767 | 0.64451  | 1.07116  |
| H  | -0.03229 | 0.22964  | -0.97913 |
| H  | -0.02946 | -1.34314 | 0.4015   |

**Table 5.** The B3LYP(def2-TZVP//def2-SVP) Cartesian coordinates for anion **2** in the gas phase.

| <b>Atom</b> | <b>x-Coordinate</b> | <b>y-Coordinate</b> | <b>z-Coordinate</b> |
|-------------|---------------------|---------------------|---------------------|
| Si          | 3.30891             | 1.18868             | -0.62053            |
| Si          | -3.38781            | -0.98124            | -1.08386            |
| N           | -2.5571             | -0.04464            | 0.10418             |
| N           | 2.44395             | -0.13011            | 0.09578             |
| C           | 3.10464             | -1.20231            | 0.74844             |
| C           | -3.74254            | 0.60384             | 2.17813             |
| C           | -3.17497            | 0.94487             | 0.9133              |
| C           | 3.59007             | 2.58101             | 0.6641              |
| H           | 4.01174             | 2.0343              | 1.52575             |
| C           | 3.34401             | -1.17442            | 2.15323             |
| C           | 3.51942             | -2.35379            | 0.01376             |
| C           | -3.20348            | 2.30954             | 0.50406             |
| C           | -2.47371            | -3.41524            | 0.21636             |
| H           | -2.75368            | -4.36019            | 0.71804             |
| H           | -2.0291             | -2.74822            | 0.96852             |
| H           | -1.67256            | -3.65316            | -0.49944            |
| C           | -5.09443            | -0.16399            | -1.41636            |
| H           | -4.87485            | 0.9159              | -1.34242            |
| C           | -3.63678            | -0.82418            | 2.69627             |
| H           | -3.66527            | -1.48028            | 1.81993             |

|   |          |          |          |
|---|----------|----------|----------|
| C | -3.69043 | -2.7745  | -0.47331 |
| H | -4.46733 | -2.65195 | 0.30391  |
| C | 4.05804  | -2.21739 | 2.76008  |
| H | 4.24139  | -2.18141 | 3.83789  |
| C | -4.33923 | 1.5983   | 2.96387  |
| H | -4.77397 | 1.3319   | 3.93004  |
| C | -3.8088  | 3.27218  | 1.32436  |
| H | -3.81883 | 4.31708  | 1.00033  |
| C | 3.7922   | 0.58391  | 3.95512  |
| H | 3.35061  | 1.454    | 4.46936  |
| H | 4.67652  | 0.93034  | 3.39676  |
| H | 4.14391  | -0.11393 | 4.73381  |
| C | 2.20714  | 1.85226  | -2.02997 |
| H | 1.23578  | 1.98298  | -1.52279 |
| C | -5.70053 | -0.41377 | -2.807   |
| H | -5.91851 | -1.48191 | -2.97505 |
| H | -5.0397  | -0.08471 | -3.62302 |
| H | -6.65765 | 0.12857  | -2.92294 |
| C | -2.52009 | 2.75066  | -0.78206 |
| H | -2.26098 | 1.83591  | -1.32226 |
| C | 2.76115  | -0.06925 | 3.02346  |
| H | 2.38185  | 0.70245  | 2.34486  |
| C | -2.16052 | 0.27676  | -3.39128 |
| H | -1.33133 | 0.76206  | -2.85455 |
| H | -3.01812 | 0.96758  | -3.37471 |
| H | -1.84389 | 0.16479  | -4.44459 |
| C | -4.27793 | -3.70788 | -1.54438 |
| H | -3.57189 | -3.86966 | -2.3757  |
| H | -5.20885 | -3.31064 | -1.97969 |
| H | -4.51255 | -4.70402 | -1.12457 |
| C | -4.78399 | -1.25382 | 3.61875  |
| H | -4.71376 | -2.33352 | 3.83148  |
| H | -5.76694 | -1.05897 | 3.15986  |
| H | -4.75619 | -0.73228 | 4.59023  |
| C | -4.38451 | 2.92862  | 2.54486  |
| H | -4.85576 | 3.69107  | 3.17196  |
| C | 5.01217  | 0.57356  | -1.24386 |
| H | 4.78659  | -0.40842 | -1.6899  |
| C | 4.23439  | -3.37021 | 0.66074  |
| H | 4.55737  | -4.24435 | 0.089    |
| C | -2.47374 | -1.0917  | -2.76275 |
| H | -3.22625 | -1.58986 | -3.40436 |
| C | 5.65032  | 1.42847  | -2.35122 |
| H | 5.85213  | 2.45976  | -2.01922 |
| H | 5.01126  | 1.49298  | -3.24484 |
| H | 6.6182   | 0.99905  | -2.6718  |
| C | 3.09498  | -2.54269 | -1.43722 |
| H | 2.82637  | -1.55212 | -1.8228  |

|   |          |          |          |
|---|----------|----------|----------|
| C | 4.1887   | -3.12042 | -2.34593 |
| H | 5.12133  | -2.53738 | -2.28018 |
| H | 3.85448  | -3.11367 | -3.39695 |
| H | 4.43058  | -4.1658  | -2.09054 |
| C | 1.5491   | -0.59585 | 3.81069  |
| H | 0.79823  | -1.01506 | 3.12592  |
| H | 1.06632  | 0.21501  | 4.38191  |
| H | 1.84796  | -1.38694 | 4.51976  |
| C | -6.12974 | -0.48277 | -0.32373 |
| H | -7.0497  | 0.11502  | -0.46086 |
| H | -5.74908 | -0.26633 | 0.68507  |
| H | -6.4294  | -1.54463 | -0.35002 |
| C | -1.20951 | -1.96657 | -2.78518 |
| H | -0.76928 | -1.99464 | -3.79929 |
| H | -1.40816 | -3.00616 | -2.48812 |
| H | -0.44167 | -1.57217 | -2.10621 |
| C | 6.01463  | 0.32338  | -0.10178 |
| H | 6.94142  | -0.14215 | -0.48606 |
| H | 5.60841  | -0.34541 | 0.67075  |
| H | 6.30996  | 1.26264  | 0.39449  |
| C | 4.52673  | -3.30309 | 2.02295  |
| H | 5.0923   | -4.10313 | 2.50943  |
| C | 4.59759  | 3.68697  | 0.3086   |
| H | 4.28675  | 4.26579  | -0.57531 |
| H | 5.60206  | 3.28925  | 0.09966  |
| H | 4.70083  | 4.40761  | 1.14181  |
| C | 1.82033  | -3.40447 | -1.49264 |
| H | 2.02353  | -4.42254 | -1.11823 |
| H | 1.43927  | -3.48539 | -2.52448 |
| H | 1.02824  | -2.96438 | -0.86991 |
| C | 2.25081  | 3.18744  | 1.1158   |
| H | 2.37797  | 3.83252  | 2.0045   |
| H | 1.50705  | 2.41581  | 1.36728  |
| H | 1.8054   | 3.81217  | 0.32454  |
| C | 1.97693  | 0.8059   | -3.13159 |
| H | 1.27144  | 1.18069  | -3.89547 |
| H | 1.54184  | -0.1151  | -2.71864 |
| H | 2.91138  | 0.53571  | -3.6534  |
| C | -2.27233 | -1.04819 | 3.37018  |
| H | -1.45091 | -0.78828 | 2.68868  |
| H | -2.14573 | -2.10173 | 3.67212  |
| H | -2.17339 | -0.41701 | 4.26945  |
| C | -1.19598 | 3.4701   | -0.4769  |
| H | -1.36747 | 4.408    | 0.07871  |
| H | -0.65773 | 3.71681  | -1.40807 |
| H | -0.54338 | 2.8271   | 0.12886  |
| C | -3.41901 | 3.5922   | -1.69836 |
| H | -3.67481 | 4.56634  | -1.24802 |

|    |          |          |          |
|----|----------|----------|----------|
| H  | -4.36333 | 3.07112  | -1.92391 |
| H  | -2.90783 | 3.79665  | -2.65423 |
| C  | 2.58451  | 3.21867  | -2.62305 |
| H  | 3.57258  | 3.21399  | -3.11056 |
| H  | 2.59925  | 4.01126  | -1.86041 |
| H  | 1.84881  | 3.52437  | -3.39001 |
| Be | 0.84355  | -0.13373 | 0.163    |
| Be | -0.95517 | -0.0895  | 0.19622  |
| H  | -0.08444 | 0.60356  | 1.16345  |
| H  | -0.04266 | 0.3674   | -0.8945  |
| H  | -0.05434 | -1.30284 | 0.33353  |

**Table 6.** The B3LYP(def2-TZVP//def2-SVP) Cartesian coordinates for anion **2** with the SMD-Benzene model.

| Atom | x-Coordinate | y-Coordinate | z-Coordinate |
|------|--------------|--------------|--------------|
| Si   | 3.31998      | 1.18391      | -0.61257     |
| Si   | -3.40846     | -0.96221     | -1.09608     |
| N    | -2.56269     | -0.04267     | 0.10039      |
| N    | 2.44566      | -0.14974     | 0.07981      |
| C    | 3.07887      | -1.23171     | 0.74279      |
| C    | -3.7159      | 0.63371      | 2.18432      |
| C    | -3.14681     | 0.96008      | 0.91787      |
| C    | 3.5957       | 2.54414      | 0.70962      |
| H    | 4.03488      | 1.9792       | 1.55168      |
| C    | 3.29417      | -1.22368     | 2.15456      |
| C    | 3.51651      | -2.36831     | 0.00089      |
| C    | -3.10955     | 2.33236      | 0.52443      |
| C    | -2.51764     | -3.43324     | 0.16772      |
| H    | -2.816       | -4.37435     | 0.66682      |
| H    | -2.04944     | -2.78468     | 0.92534      |
| H    | -1.72956     | -3.68957     | -0.55695     |
| C    | -5.10786     | -0.12702     | -1.41085     |
| H    | -4.88141     | 0.94849      | -1.3014      |
| C    | -3.68025     | -0.80874     | 2.67987      |
| H    | -3.80441     | -1.44782     | 1.79804      |
| C    | -3.7244      | -2.7587      | -0.50408     |
| H    | -4.49345     | -2.63817     | 0.28003      |
| C    | 4.02014      | -2.26465     | 2.75435      |
| H    | 4.18808      | -2.24487     | 3.83496      |
| C    | -4.25584     | 1.64966      | 2.98554      |
| H    | -4.6981      | 1.39646      | 3.95126      |
| C    | -3.6503      | 3.31692      | 1.36423      |
| H    | -3.61088     | 4.36497      | 1.05191      |
| C    | 3.67896      | 0.48773      | 4.01992      |
| H    | 3.21777      | 1.34378      | 4.54115      |
| H    | 4.58129      | 0.85285      | 3.50307      |
| H    | 4.00885      | -0.22584     | 4.79379      |

|   |          |          |          |
|---|----------|----------|----------|
| C | 2.20946  | 1.88972  | -2.00183 |
| H | 1.24778  | 2.05338  | -1.4762  |
| C | -5.7103  | -0.33032 | -2.80994 |
| H | -5.93121 | -1.39104 | -3.01756 |
| H | -5.04829 | 0.02594  | -3.61396 |
| H | -6.6656  | 0.21784  | -2.91237 |
| C | -2.43514 | 2.7489   | -0.7755  |
| H | -2.235   | 1.82465  | -1.32083 |
| C | 2.6811   | -0.14614 | 3.04028  |
| H | 2.31235  | 0.63888  | 2.37333  |
| C | -2.16287 | 0.3012   | -3.39692 |
| H | -1.31532 | 0.76589  | -2.8694  |
| H | -3.00471 | 1.0114   | -3.36748 |
| H | -1.85848 | 0.19369  | -4.45485 |
| C | -4.33123 | -3.66199 | -1.58926 |
| H | -3.63263 | -3.824   | -2.42786 |
| H | -5.25711 | -3.24178 | -2.01402 |
| H | -4.58424 | -4.66183 | -1.18925 |
| C | -4.80087 | -1.17724 | 3.6605   |
| H | -4.79478 | -2.26331 | 3.85155  |
| H | -5.79469 | -0.90984 | 3.26559  |
| H | -4.68327 | -0.68006 | 4.63749  |
| C | -4.23338 | 2.98687  | 2.58539  |
| H | -4.65921 | 3.76395  | 3.22677  |
| C | 5.01882  | 0.58138  | -1.26392 |
| H | 4.79422  | -0.39475 | -1.72035 |
| C | 4.25183  | -3.37631 | 0.6378   |
| H | 4.59637  | -4.23716 | 0.05929  |
| C | -2.49941 | -1.0668  | -2.78026 |
| H | -3.26131 | -1.54388 | -3.42724 |
| C | 5.63984  | 1.45125  | -2.36885 |
| H | 5.84885  | 2.47836  | -2.02973 |
| H | 4.99151  | 1.52474  | -3.25473 |
| H | 6.60302  | 1.02615  | -2.70926 |
| C | 3.08099  | -2.5476  | -1.44942 |
| H | 2.79743  | -1.55854 | -1.82807 |
| C | 4.16492  | -3.11437 | -2.37569 |
| H | 5.10344  | -2.54087 | -2.30717 |
| H | 3.8246   | -3.08237 | -3.42444 |
| H | 4.4011   | -4.1673  | -2.14739 |
| C | 1.45884  | -0.70651 | 3.78448  |
| H | 0.73395  | -1.13282 | 3.07688  |
| H | 0.94368  | 0.08674  | 4.35284  |
| H | 1.7512   | -1.50013 | 4.49327  |
| C | -6.15005 | -0.4733  | -0.33351 |
| H | -7.05899 | 0.14667  | -0.44371 |
| H | -5.76939 | -0.30731 | 0.68501  |
| H | -6.47162 | -1.52693 | -0.40211 |

|    |          |          |          |
|----|----------|----------|----------|
| C  | -1.24957 | -1.96313 | -2.81103 |
| H  | -0.77658 | -1.94833 | -3.81035 |
| H  | -1.47374 | -3.01323 | -2.57528 |
| H  | -0.50064 | -1.62027 | -2.08729 |
| C  | 6.04192  | 0.33598  | -0.13961 |
| H  | 6.95587  | -0.14493 | -0.5358  |
| H  | 5.65055  | -0.31652 | 0.65458  |
| H  | 6.35998  | 1.27848  | 0.33713  |
| C  | 4.52692  | -3.32432 | 2.00495  |
| H  | 5.10372  | -4.11925 | 2.48638  |
| C  | 4.58784  | 3.66722  | 0.3692   |
| H  | 4.25973  | 4.2719   | -0.49158 |
| H  | 5.59208  | 3.28483  | 0.13339  |
| H  | 4.70255  | 4.3637   | 1.22126  |
| C  | 1.80837  | -3.41402 | -1.48603 |
| H  | 2.02645  | -4.44134 | -1.14752 |
| H  | 1.38919  | -3.47239 | -2.50651 |
| H  | 1.03799  | -2.9942  | -0.82075 |
| C  | 2.25114  | 3.13466  | 1.19348  |
| H  | 2.38689  | 3.7752   | 2.08402  |
| H  | 1.52124  | 2.35253  | 1.45326  |
| H  | 1.78482  | 3.75992  | 0.41296  |
| C  | 1.93054  | 0.85671  | -3.10351 |
| H  | 1.221    | 1.25306  | -3.85298 |
| H  | 1.479    | -0.05602 | -2.68732 |
| H  | 2.84612  | 0.56362  | -3.64614 |
| C  | -2.30319 | -1.13366 | 3.27805  |
| H  | -1.49807 | -0.92977 | 2.55955  |
| H  | -2.23447 | -2.19447 | 3.5737   |
| H  | -2.11066 | -0.51771 | 4.17338  |
| C  | -1.06742 | 3.39422  | -0.50403 |
| H  | -1.16521 | 4.34212  | 0.05276  |
| H  | -0.53729 | 3.61122  | -1.44784 |
| H  | -0.43794 | 2.71559  | 0.09054  |
| C  | -3.31668 | 3.63436  | -1.66529 |
| H  | -3.50964 | 4.62022  | -1.20928 |
| H  | -4.29467 | 3.16364  | -1.85944 |
| H  | -2.82929 | 3.81341  | -2.63868 |
| C  | 2.61889  | 3.25072  | -2.58439 |
| H  | 3.59993  | 3.22751  | -3.08323 |
| H  | 2.66145  | 4.03624  | -1.81426 |
| H  | 1.88491  | 3.58684  | -3.34039 |
| Be | 0.84738  | -0.14371 | 0.14075  |
| Be | -0.96009 | -0.09762 | 0.18369  |
| H  | -0.08042 | 0.53609  | 1.1845   |
| H  | -0.04777 | 0.42669  | -0.8803  |
| H  | -0.05215 | -1.31658 | 0.23783  |

**Table 7.** The B3LYP(def2-TZVP//def2-SVP) Cartesian coordinates for anion **2** with the SMD-THF model.

| Atom | x-Coordinate | y-Coordinate | z-Coordinate |
|------|--------------|--------------|--------------|
| Si   | 3.33218      | 1.19152      | -0.60799     |
| Si   | -3.41863     | -0.9828      | -1.08524     |
| N    | -2.56117     | -0.04868     | 0.09557      |
| N    | 2.45345      | -0.13708     | 0.08979      |
| C    | 3.10457      | -1.21631     | 0.74152      |
| C    | -3.72965     | 0.61905      | 2.17627      |
| C    | -3.16113     | 0.95061      | 0.90739      |
| C    | 3.60255      | 2.5646       | 0.69723      |
| H    | 4.0137       | 2.00608      | 1.55685      |
| C    | 3.3135       | -1.20692     | 2.15294      |
| C    | 3.53888      | -2.3581      | -0.00023     |
| C    | -3.16884     | 2.31751      | 0.49835      |
| C    | -2.51802     | -3.4282      | 0.21155      |
| H    | -2.80557     | -4.37397     | 0.70773      |
| H    | -2.06802     | -2.77484     | 0.9732       |
| H    | -1.72046     | -3.67227     | -0.50708     |
| C    | -5.1184      | -0.15112     | -1.39985     |
| H    | -4.89465     | 0.92694      | -1.31218     |
| C    | -3.65954     | -0.8131      | 2.69185      |
| H    | -3.7226      | -1.46672     | 1.81521      |
| C    | -3.72894     | -2.772       | -0.47201     |
| H    | -4.50231     | -2.64572     | 0.30783      |
| C    | 4.01358      | -2.25916     | 2.76268      |
| H    | 4.17462      | -2.23717     | 3.8444       |
| C    | -4.30193     | 1.62542      | 2.96726      |
| H    | -4.73705     | 1.36771      | 3.93559      |
| C    | -3.75131     | 3.29171      | 1.32388      |
| H    | -3.74771     | 4.33648      | 0.99928      |
| C    | 3.73867      | 0.53303      | 3.98014      |
| H    | 3.29234      | 1.40255      | 4.49167      |
| H    | 4.63548      | 0.88141      | 3.44274      |
| H    | 4.07245      | -0.1703      | 4.76163      |
| C    | 2.23124      | 1.86672      | -2.01217     |
| H    | 1.26064      | 1.99448      | -1.50239     |
| C    | -5.72993     | -0.37688     | -2.79216     |
| H    | -5.95693     | -1.44036     | -2.97678     |
| H    | -5.07218     | -0.03742     | -3.60677     |
| H    | -6.68342     | 0.17393      | -2.89672     |
| C    | -2.49975     | 2.75138      | -0.79867     |
| H    | -2.23127     | 1.83334      | -1.32857     |
| C    | 2.72117      | -0.10818     | 3.02624      |
| H    | 2.35518      | 0.67117      | 2.3492       |
| C    | -2.19666     | 0.26572      | -3.40372     |
| H    | -1.35318     | 0.74854      | -2.88608     |



|   |          |          |          |
|---|----------|----------|----------|
| H | -3.04671 | 0.96515  | -3.37556 |
| H | -1.90052 | 0.14994  | -4.46278 |
| C | -4.32732 | -3.69719 | -1.54402 |
| H | -3.62091 | -3.87721 | -2.37155 |
| H | -5.24936 | -3.28669 | -1.98585 |
| H | -4.58325 | -4.68728 | -1.12241 |
| C | -4.80202 | -1.20942 | 3.63389  |
| H | -4.76283 | -2.29219 | 3.83943  |
| H | -5.78843 | -0.98449 | 3.19598  |
| H | -4.74075 | -0.69561 | 4.6077   |
| C | -4.32348 | 2.95806  | 2.54983  |
| H | -4.77605 | 3.7286   | 3.18074  |
| C | 5.03586  | 0.5835   | -1.22973 |
| H | 4.8169   | -0.39265 | -1.69113 |
| C | 4.23871  | -3.38442 | 0.65042  |
| H | 4.57826  | -4.24999 | 0.07545  |
| C | -2.51286 | -1.09816 | -2.76779 |
| H | -3.27246 | -1.59202 | -3.40364 |
| C | 5.67747  | 1.45402  | -2.32288 |
| H | 5.87985  | 2.4808   | -1.97776 |
| H | 5.04442  | 1.52859  | -3.22019 |
| H | 6.64631  | 1.02843  | -2.64535 |
| C | 3.16299  | -2.52412 | -1.46839 |
| H | 2.92219  | -1.52599 | -1.8525  |
| C | 4.27882  | -3.10941 | -2.34386 |
| H | 5.22245  | -2.55125 | -2.2307  |
| H | 3.98875  | -3.07164 | -3.40738 |
| H | 4.48592  | -4.16566 | -2.10392 |
| C | 1.49882  | -0.63897 | 3.79449  |
| H | 0.7624   | -1.07427 | 3.10313  |
| H | 0.99832  | 0.17194  | 4.35071  |
| H | 1.78891  | -1.42001 | 4.51834  |
| C | -6.15339 | -0.48346 | -0.31122 |
| H | -7.06113 | 0.13815  | -0.42124 |
| H | -5.76571 | -0.313   | 0.70421  |
| H | -6.478   | -1.53654 | -0.3698  |
| C | -1.25625 | -1.98353 | -2.7979  |
| H | -0.81954 | -2.01238 | -3.81387 |
| H | -1.46263 | -3.02312 | -2.50534 |
| H | -0.47974 | -1.59959 | -2.12226 |
| C | 6.03558  | 0.32389  | -0.0879  |
| H | 6.95663  | -0.15419 | -0.47052 |
| H | 5.62519  | -0.33858 | 0.68882  |
| H | 6.34407  | 1.25932  | 0.40729  |
| C | 4.49758  | -3.3365  | 2.02135  |
| H | 5.0512   | -4.14359 | 2.50989  |
| C | 4.61661  | 3.67154  | 0.36465  |
| H | 4.31384  | 4.26794  | -0.51061 |

|    |          |          |          |
|----|----------|----------|----------|
| H  | 5.62185  | 3.27539  | 0.15685  |
| H  | 4.71821  | 4.37785  | 1.21031  |
| C  | 1.87968  | -3.36596 | -1.58254 |
| H  | 2.05249  | -4.39463 | -1.22166 |
| H  | 1.53432  | -3.42498 | -2.62858 |
| H  | 1.07021  | -2.92848 | -0.98018 |
| C  | 2.2634   | 3.17385  | 1.14461  |
| H  | 2.38399  | 3.7956   | 2.05097  |
| H  | 1.5081   | 2.40539  | 1.37027  |
| H  | 1.83649  | 3.82404  | 0.3633   |
| C  | 2.00345  | 0.83681  | -3.12983 |
| H  | 1.29286  | 1.2189   | -3.88589 |
| H  | 1.58075  | -0.09989 | -2.73742 |
| H  | 2.9378   | 0.58683  | -3.66173 |
| C  | -2.2924  | -1.07897 | 3.34437  |
| H  | -1.47307 | -0.84849 | 2.64963  |
| H  | -2.19421 | -2.13484 | 3.64849  |
| H  | -2.15754 | -0.45136 | 4.24195  |
| C  | -1.18721 | 3.50097  | -0.51703 |
| H  | -1.37051 | 4.45207  | 0.01203  |
| H  | -0.657   | 3.73351  | -1.45641 |
| H  | -0.51774 | 2.89005  | 0.10451  |
| C  | -3.41924 | 3.56742  | -1.71751 |
| H  | -3.68616 | 4.54292  | -1.27673 |
| H  | -4.3577  | 3.03077  | -1.93166 |
| H  | -2.92005 | 3.76978  | -2.68029 |
| C  | 2.60844  | 3.24009  | -2.58827 |
| H  | 3.59207  | 3.23864  | -3.0846  |
| H  | 2.63173  | 4.02356  | -1.81637 |
| H  | 1.86863  | 3.55966  | -3.34597 |
| Be | 0.85603  | -0.1382  | 0.15067  |
| Be | -0.96143 | -0.09725 | 0.18023  |
| H  | -0.09026 | 0.61031  | 1.1439   |
| H  | -0.03941 | 0.34612  | -0.90937 |
| H  | -0.04647 | -1.30829 | 0.34337  |

**Table 8.** The B3LYP(def2-TZVP//def2-SVP) Cartesian coordinates for anion  $[\{(Xyl)(Me_3Si)NBe\}_2H_3]^-$  in the gas phase.

| Atom | x-Coordinate | y-Coordinate | z-Coordinate |
|------|--------------|--------------|--------------|
| Si   | 3.04628      | 1.74873      | -1.15272     |
| Si   | -3.04616     | -1.74843     | -1.15342     |
| N    | -2.46374     | -0.44239     | -0.20817     |
| N    | 2.46376      | 0.44245      | -0.20786     |
| C    | 3.30277      | -0.42361     | 0.5207       |
| C    | -3.61913     | 0.14665      | 1.87648      |
| C    | -3.30282     | 0.42347      | 0.52053      |
| C    | 2.36266      | 3.40117      | -0.55607     |

|    |          |          |          |
|----|----------|----------|----------|
| C  | 3.61898  | -0.14711 | 1.87674  |
| C  | 3.81454  | -1.60472 | -0.07804 |
| C  | -3.81457 | 1.60471  | -0.07798 |
| C  | -4.92913 | -1.80004 | -1.06877 |
| C  | -3.03848 | -1.08064 | 2.52976  |
| C  | -2.36259 | -3.40102 | -0.55713 |
| C  | 4.44982  | -1.02217 | 2.58956  |
| H  | 4.6872   | -0.79693 | 3.63469  |
| C  | -4.45005 | 1.02154  | 2.58944  |
| H  | -4.68752 | 0.79605  | 3.63449  |
| C  | -4.64266 | 2.45786  | 0.6643   |
| H  | -5.032   | 3.36538  | 0.19078  |
| C  | 2.51034  | 1.58542  | -2.95263 |
| C  | -3.44398 | 1.92739  | -1.50273 |
| C  | 3.0383   | 1.08004  | 2.53025  |
| C  | -4.96928 | 2.17198  | 1.99162  |
| H  | -5.61574 | 2.84722  | 2.56004  |
| C  | 4.92925  | 1.8003   | -1.06788 |
| C  | 4.64255  | -2.45805 | 0.66411  |
| H  | 5.0319   | -3.36548 | 0.19041  |
| C  | -2.51004 | -1.58465 | -2.95324 |
| C  | 3.44405  | -1.92707 | -1.5029  |
| C  | 4.96907  | -2.17249 | 1.99152  |
| H  | 5.61547  | -2.84788 | 2.55984  |
| Be | 0.88789  | 0.16428  | -0.16168 |
| Be | -0.88788 | -0.16421 | -0.16179 |
| H  | -0.13995 | 1.03684  | -0.77294 |
| H  | 0.14003  | -1.03667 | -0.77311 |
| H  | -0.00005 | -0.00007 | 1.04552  |
| H  | 5.27086  | 1.92284  | -0.02729 |
| H  | 5.33654  | 2.63403  | -1.66414 |
| H  | 5.36716  | 0.86184  | -1.44436 |
| H  | 1.41446  | 1.47543  | -2.99447 |
| H  | 2.95166  | 0.69455  | -3.42717 |
| H  | 2.78987  | 2.47042  | -3.54955 |
| H  | 2.71386  | 3.64248  | 0.45992  |
| H  | 1.26236  | 3.34843  | -0.52397 |
| H  | 2.64773  | 4.23074  | -1.22578 |
| H  | 2.35145  | -1.88692 | -1.63735 |
| H  | 3.80775  | -2.92356 | -1.79869 |
| H  | 3.86367  | -1.1878  | -2.20469 |
| H  | 3.27477  | 1.1153   | 3.60524  |
| H  | 1.94454  | 1.10566  | 2.40067  |
| H  | 3.42047  | 2.00282  | 2.0643   |
| H  | -3.80767 | 2.92394  | -1.79832 |
| H  | -3.86354 | 1.18828  | -2.20472 |
| H  | -2.35137 | 1.88729  | -1.63712 |
| H  | -3.27506 | -1.11615 | 3.60471  |

|   |          |          |          |
|---|----------|----------|----------|
| H | -1.94471 | -1.10619 | 2.40028  |
| H | -3.42058 | -2.00331 | 2.06355  |
| H | -1.41416 | -1.47463 | -2.99494 |
| H | -2.95133 | -0.69367 | -3.42758 |
| H | -2.7895  | -2.4695  | -3.55041 |
| H | -5.27084 | -1.92286 | -0.02825 |
| H | -5.33636 | -2.63361 | -1.6653  |
| H | -5.36701 | -0.86148 | -1.44504 |
| H | -2.71389 | -3.6426  | 0.45876  |
| H | -1.26229 | -3.34828 | -0.5249  |
| H | -2.64757 | -4.23042 | -1.22708 |

**Table 9.** The B3LYP(def2-TZVP//def2-SVP) Cartesian coordinates for anion  $[\{(Xyl)(Me_3Si)NBe\}_2H_3]^-$  with the SMD-THF model.

| Atom | x-Coordinate | y-Coordinate | z-Coordinate |
|------|--------------|--------------|--------------|
| Si   | 3.11416      | 1.70983      | -1.19551     |
| Si   | -3.11396     | -1.70951     | -1.19621     |
| N    | -2.46808     | -0.43261     | -0.23981     |
| N    | 2.4681       | 0.4327       | -0.23954     |
| C    | 3.26437      | -0.44074     | 0.53261      |
| C    | -3.5452      | 0.14345      | 1.8932       |
| C    | -3.26447     | 0.4406       | 0.53248      |
| C    | 2.46711      | 3.38829      | -0.63945     |
| C    | 3.54506      | -0.14389     | 1.89341      |
| C    | 3.76542      | -1.64627     | -0.02818     |
| C    | -3.7656      | 1.64621      | -0.02808     |
| C    | -4.99075     | -1.71532     | -1.08114     |
| C    | -2.99886     | -1.12081     | 2.50367      |
| C    | -2.46701     | -3.3881      | -0.64043     |
| C    | 4.32215      | -1.03141     | 2.65279      |
| H    | 4.53316      | -0.79189     | 3.69998      |
| C    | -4.3224      | 1.03074      | 2.65273      |
| H    | -4.53343     | 0.79098      | 3.69987      |
| C    | -4.53927     | 2.51079      | 0.76119      |
| H    | -4.92112     | 3.43656      | 0.31887      |
| C    | 2.6033       | 1.52287      | -2.99797     |
| C    | -3.45893     | 1.98243      | -1.46479     |
| C    | 2.99881      | 1.12027      | 2.50412      |
| C    | -4.82379     | 2.20991      | 2.09553      |
| H    | -5.42753     | 2.89341      | 2.69943      |
| C    | 4.99092      | 1.71559      | -1.08009     |
| C    | 4.53897      | -2.51109     | 0.76094      |
| H    | 4.92075      | -3.4368      | 0.31844      |
| C    | -2.60275     | -1.52209     | -2.99852     |
| C    | 3.4588       | -1.98214     | -1.46498     |
| C    | 4.82346      | -2.21051     | 2.09536      |
| H    | 5.42711      | -2.8942      | 2.69914      |

|    |          |          |          |
|----|----------|----------|----------|
| Be | 0.89605  | 0.17535  | -0.21776 |
| Be | -0.89605 | -0.17519 | -0.21783 |
| H  | -0.13913 | 1.03723  | -0.82989 |
| H  | 0.1392   | -1.03707 | -0.82985 |
| H  | -0.00008 | 0.0001   | 0.98721  |
| H  | 5.32994  | 1.85879  | -0.04068 |
| H  | 5.41891  | 2.53162  | -1.68745 |
| H  | 5.42268  | 0.76736  | -1.44037 |
| H  | 1.50439  | 1.46279  | -3.07589 |
| H  | 3.01676  | 0.60411  | -3.44527 |
| H  | 2.9361   | 2.3796   | -3.60937 |
| H  | 2.80573  | 3.64129  | 0.37867  |
| H  | 1.3641   | 3.38814  | -0.63166 |
| H  | 2.79721  | 4.19512  | -1.31694 |
| H  | 2.37666  | -1.92189 | -1.66331 |
| H  | 3.8104   | -2.99182 | -1.727   |
| H  | 3.93571  | -1.2681  | -2.1563  |
| H  | 3.21153  | 1.1726   | 3.58286  |
| H  | 1.90926  | 1.19118  | 2.3547   |
| H  | 3.42935  | 2.01645  | 2.0286   |
| H  | -3.81057 | 2.99216  | -1.72658 |
| H  | -3.93576 | 1.26853  | -2.1563  |
| H  | -2.37677 | 1.92229  | -1.66307 |
| H  | -3.21168 | -1.17342 | 3.58237  |
| H  | -1.90929 | -1.19155 | 2.35434  |
| H  | -3.42925 | -2.01691 | 2.02788  |
| H  | -1.50382 | -1.46203 | -3.07622 |
| H  | -3.0161  | -0.6032  | -3.44566 |
| H  | -2.93546 | -2.37866 | -3.61021 |
| H  | -5.32995 | -1.85883 | -0.04183 |
| H  | -5.41861 | -2.5312  | -1.6888  |
| H  | -5.42245 | -0.767   | -1.44123 |
| H  | -2.80582 | -3.64135 | 0.37756  |
| H  | -1.364   | -3.38795 | -0.63244 |
| H  | -2.79698 | -4.19477 | -1.31819 |

**Table 10.** The B3LYP(def2-TZVP//def2-SVP) Cartesian coordinates for neutral  $\{(Xyl)(Me_3Si)NBeH\}_2$  in the gas phase.

| Atom | x-Coordinate | y-Coordinate | z-Coordinate |
|------|--------------|--------------|--------------|
| Si   | -2.98726     | -2.25056     | 0.00406      |
| Si   | 2.98708      | 2.2505       | 0.00434      |
| N    | 2.46424      | 0.54301      | -0.00753     |
| N    | -2.46426     | -0.54313     | -0.00752     |
| C    | -3.4299      | 0.51281      | -0.00504     |
| C    | 3.89033      | -1.04929     | 1.22692      |
| C    | 3.42996      | -0.51282     | -0.00508     |
| C    | -2.27059     | -3.11887     | 1.52764      |

|    |          |          |          |
|----|----------|----------|----------|
| C  | -3.89049 | 1.04908  | 1.22696  |
| C  | -3.9159  | 1.03225  | -1.23443 |
| C  | 3.91633  | -1.03193 | -1.23446 |
| C  | 4.87303  | 2.29906  | 0.02344  |
| C  | 3.36525  | -0.51129 | 2.53495  |
| C  | 2.26991  | 3.11854  | 1.52784  |
| C  | -4.84251 | 2.08516  | 1.20884  |
| H  | -5.19946 | 2.49679  | 2.16143  |
| C  | 4.84248  | -2.08525 | 1.20881  |
| H  | 5.19925  | -2.49703 | 2.16141  |
| C  | 4.86799  | -2.06827 | -1.21074 |
| H  | 5.24468  | -2.46683 | -2.16129 |
| C  | -2.2985  | -3.13261 | -1.52437 |
| C  | 3.41928  | -0.4754  | -2.54564 |
| C  | -3.36579 | 0.51078  | 2.53501  |
| C  | 5.33509  | -2.593   | 0.00046  |
| H  | 6.07755  | -3.39982 | 0.00263  |
| C  | -4.87322 | -2.29901 | 0.02254  |
| C  | -4.86744 | 2.0687   | -1.21073 |
| H  | -5.24385 | 2.46751  | -2.16129 |
| C  | 2.2986   | 3.13263  | -1.52416 |
| C  | -3.41852 | 0.47599  | -2.5456  |
| C  | -5.33477 | 2.59322  | 0.00047  |
| H  | -6.07714 | 3.40013  | 0.00263  |
| Be | -0.96755 | -0.19912 | -0.0145  |
| Be | 0.96754  | 0.19888  | -0.01447 |
| H  | -0.22268 | 1.07174  | -0.01636 |
| H  | 0.22267  | -1.072   | -0.01643 |
| H  | -5.27606 | -1.78569 | 0.91386  |
| H  | -5.23576 | -3.34347 | 0.0319   |
| H  | -5.29411 | -1.79539 | -0.86592 |
| H  | -1.19549 | -3.05277 | -1.55293 |
| H  | -2.69225 | -2.69929 | -2.46087 |
| H  | -2.5544  | -4.20882 | -1.51034 |
| H  | -2.648   | -2.67742 | 2.4671   |
| H  | -1.16729 | -3.03834 | 1.536    |
| H  | -2.52608 | -4.19526 | 1.52775  |
| H  | -2.31416 | 0.49096  | -2.60169 |
| H  | -3.81731 | 1.04945  | -3.39892 |
| H  | -3.7163  | -0.58043 | -2.67743 |
| H  | -3.756   | 1.08884  | 3.38918  |
| H  | -2.26075 | 0.53808  | 2.57305  |
| H  | -3.65004 | -0.54731 | 2.68189  |
| H  | 3.81806  | -1.04885 | -3.39897 |
| H  | 3.71735  | 0.58097  | -2.67731 |
| H  | 2.31492  | -0.49007 | -2.60189 |
| H  | 3.75537  | -1.08943 | 3.38911  |
| H  | 2.26022  | -0.53876 | 2.57274  |

|   |          |          |          |
|---|----------|----------|----------|
| H | 3.6493   | 0.54682  | 2.68205  |
| H | 1.1956   | 3.05264  | -1.55283 |
| H | 2.69247  | 2.69937  | -2.46064 |
| H | 2.55436  | 4.20886  | -1.51006 |
| H | 5.2756   | 1.78564  | 0.91482  |
| H | 5.23549  | 3.34355  | 0.03309  |
| H | 5.29427  | 1.79562  | -0.86495 |
| H | 2.64734  | 2.67712  | 2.46732  |
| H | 1.16664  | 3.03769  | 1.53605  |
| H | 2.52509  | 4.195    | 1.52808  |
| H | -2.79698 | -4.19477 | -1.31819 |

**Table 11.** The B3LYP(def2-TZVP//def2-SVP) Cartesian coordinates for neutral  $\{(Xyl)(Me_3Si)NBeH\}_2$  with the SMD-THF model.

| Atom | x-Coordinate | y-Coordinate | z-Coordinate |
|------|--------------|--------------|--------------|
| Si   | -2.98021     | 2.23522      | 0.01244      |
| Si   | 2.98024      | -2.23522     | 0.01188      |
| N    | 2.45543      | -0.56578     | 0.02202      |
| N    | -2.45543     | 0.56576      | 0.02239      |
| C    | -3.38929     | -0.51079     | 0.00243      |
| C    | 3.79545      | 1.07566      | -1.23292     |
| C    | 3.38928      | 0.51079      | 0.00215      |
| C    | -2.27718     | 3.11752      | -1.48806     |
| C    | -3.79557     | -1.07548     | -1.23269     |
| C    | -3.89319     | -1.03991     | 1.21702      |
| C    | 3.89326      | 1.03975      | 1.21678      |
| C    | 4.85032      | -2.30078     | -0.01725     |
| C    | 3.24621      | 0.53387      | -2.52734     |
| C    | 2.27715      | -3.11736     | -1.48868     |
| C    | -4.70963     | -2.13993     | -1.23411     |
| H    | -5.02309     | -2.57013     | -2.1901      |
| C    | 4.7095       | 2.14012      | -1.23426     |
| H    | 5.02287      | 2.57046      | -2.19022     |
| C    | 4.80545      | 2.10518      | 1.17593      |
| H    | 5.19372      | 2.50863      | 2.116        |
| C    | -2.31794     | 3.12337      | 1.52766      |
| C    | 3.44891      | 0.46056      | 2.53495      |
| C    | -3.24641     | -0.53353     | -2.52707     |
| C    | 5.21886      | 2.65411      | -0.03978     |
| H    | 5.93114      | 3.48358      | -0.05609     |
| C    | -4.8503      | 2.30081      | -0.01659     |
| C    | -4.8054      | -2.10533     | 1.17609      |
| H    | -5.19361     | -2.50891     | 2.11613      |
| C    | 2.31806      | -3.12356     | 1.52703      |
| C    | -3.44872     | -0.46092     | 2.53525      |
| C    | -5.21892     | -2.65408     | -0.03966     |
| H    | -5.93121     | -3.48353     | -0.05604     |

|    |          |          |          |
|----|----------|----------|----------|
| Be | -0.96256 | 0.2145   | 0.03868  |
| Be | 0.96256  | -0.21453 | 0.03847  |
| H  | -0.23598 | -1.06175 | 0.0409   |
| H  | 0.23598  | 1.06172  | 0.04087  |
| H  | -5.25818 | 1.80363  | -0.91158 |
| H  | -5.19843 | 3.34765  | -0.02482 |
| H  | -5.28766 | 1.80751  | 0.86633  |
| H  | -1.21804 | 3.04434  | 1.57005  |
| H  | -2.71982 | 2.69998  | 2.46208  |
| H  | -2.57158 | 4.19704  | 1.50425  |
| H  | -2.65868 | 2.69357  | -2.43089 |
| H  | -1.17696 | 3.0341   | -1.50437 |
| H  | -2.52735 | 4.19218  | -1.47324 |
| H  | -2.3494  | -0.4366  | 2.61379  |
| H  | -3.84479 | -1.04102 | 3.38182  |
| H  | -3.7865  | 0.58143  | 2.65318  |
| H  | -3.59115 | -1.12511 | -3.38803 |
| H  | -2.14371 | -0.53209 | -2.52682 |
| H  | -3.55264 | 0.51247  | -2.68936 |
| H  | 3.84502  | 1.04055  | 3.38158  |
| H  | 3.78673  | -0.5818  | 2.65271  |
| H  | 2.34959  | 0.43618  | 2.61357  |
| H  | 3.59089  | 1.12557  | -3.38824 |
| H  | 2.14352  | 0.53242  | -2.52702 |
| H  | 3.55244  | -0.5121  | -2.68979 |
| H  | 1.21816  | -3.04455 | 1.56949  |
| H  | 2.71998  | -2.70027 | 2.46148  |
| H  | 2.57172  | -4.19722 | 1.50348  |
| H  | 5.25815  | -1.8035  | -0.9122  |
| H  | 5.19848  | -3.34761 | -0.02562 |
| H  | 5.28773  | -1.80758 | 0.86571  |
| H  | 2.65859  | -2.69329 | -2.43148 |
| H  | 1.17692  | -3.03397 | -1.50493 |
| H  | 2.52735  | -4.19202 | -1.47401 |

**Table 12.** The B3LYP(def2-TZVP//def2-SVP) Cartesian coordinates for cation  $[\text{Me}_3\text{Si}]^+$  in the gas phase.

| Atom | x-Coordinate | y-Coordinate | z-Coordinate |
|------|--------------|--------------|--------------|
| Si   | -0.00009     | -0.00006     | -0.00038     |
| C    | 1.23567      | -1.34409     | -0.00186     |
| H    | 1.03456      | -2.03727     | -0.83928     |
| H    | 1.11802      | -1.94291     | 0.92173      |
| H    | 2.27123      | -0.98        | -0.06442     |
| C    | -1.78202     | -0.398       | 0.0003       |
| H    | -2.26134     | 0.06554      | -0.88257     |
| H    | -2.2627      | 0.06447      | 0.88274      |
| H    | -1.98434     | -1.47867     | -0.00128     |



|   |          |         |          |
|---|----------|---------|----------|
| C | 0.54635  | 1.74201 | 0.00159  |
| H | 1.14057  | 1.93616 | -0.91175 |
| H | 1.23238  | 1.91667 | 0.85107  |
| H | -0.28716 | 2.45742 | 0.04888  |

**Table 13.** The B3LYP(def2-TZVP//def2-SVP) Cartesian coordinates for neutral  $[\text{Me}_3\text{Si}]^+$  with the SMD-THF model.

| Atom | x-Coordinate | y-Coordinate | z-Coordinate |
|------|--------------|--------------|--------------|
| Si   | 0.00039      | -0.00019     | 0.00247      |
| C    | -1.19824     | 1.37123      | -0.0031      |
| H    | -0.97075     | 2.05434      | -0.84176     |
| H    | -1.06282     | 1.96179      | 0.92347      |
| H    | -2.2419      | 1.0302       | -0.06815     |
| C    | 1.78697      | 0.35093      | -0.00064     |
| H    | 2.24734      | -0.1266      | -0.88531     |
| H    | 2.25443      | -0.12159     | 0.88269      |
| H    | 2.01052      | 1.42715      | -0.00535     |
| C    | -0.59001     | -1.72238     | 0.00069      |
| H    | -1.18528     | -1.88817     | -0.9176      |
| H    | -1.27817     | -1.87809     | 0.85177      |
| H    | 0.22884      | -2.45503     | 0.04407      |

**Table 14.** The B3LYP(def2-TZVP//def2-SVP) Cartesian coordinates for neutral  $\text{Me}_3\text{SiH}$  in the gas phase.

| Atom | x-Coordinate | y-Coordinate | z-Coordinate |
|------|--------------|--------------|--------------|
| Si   | 0.00004      | -0.00004     | 0.37905      |
| C    | -1.27143     | -1.24294     | -0.22223     |
| H    | -1.30099     | -1.27136     | -1.32454     |
| H    | -2.28267     | -0.98662     | 0.13295      |
| H    | -1.03807     | -2.25993     | 0.13237      |
| C    | -0.44085     | 1.72248      | -0.22216     |
| H    | -0.45147     | 1.76207      | -1.32447     |
| H    | 0.28699      | 2.47016      | 0.13234      |
| H    | -1.43802     | 2.02885      | 0.13315      |
| C    | 1.71223      | -0.47948     | -0.22232     |
| H    | 1.75165      | -0.49048     | -1.32464     |
| H    | 1.99608      | -1.48347     | 0.13248      |
| H    | 2.4761       | 0.23118      | 0.13253      |
| H    | 0.00009      | -0.00011     | 1.87133      |

**Table 15.** The B3LYP(def2-TZVP//def2-SVP) Cartesian coordinates for neutral  $\text{Me}_3\text{SiH}$  with the SMD-THF model.

| Atom | x-Coordinate | y-Coordinate | z-Coordinate |
|------|--------------|--------------|--------------|
| Si   | 0.0001       | 0.00008      | -0.37532     |

|   |          |          |          |
|---|----------|----------|----------|
| C | -1.17832 | 1.33067  | 0.22016  |
| H | -1.20532 | 1.3607   | 1.32313  |
| H | -2.20638 | 1.14732  | -0.13497 |
| H | -0.87213 | 2.32927  | -0.13431 |
| C | -0.56351 | -1.68566 | 0.22012  |
| H | -0.57683 | -1.72382 | 1.32311  |
| H | 0.10947  | -2.48453 | -0.13421 |
| H | -1.58119 | -1.91958 | -0.1352  |
| C | 1.74171  | 0.3549   | 0.22018  |
| H | 1.78112  | 0.36284  | 1.32314  |
| H | 2.09735  | 1.33696  | -0.13443 |
| H | 2.45309  | -0.40983 | -0.13459 |
| H | 0.00012  | 0.00015  | -1.86998 |

## 4. References

---

1. (a) I. C. Cai, M. I. Lipschutz, and T. D. Tilley, *Chem. Commun.*, 2014, **50**, 13062–13065; (b) I. C. Cai, M. S. Ziegler, P. C. Bunting, A. Nicolay, D. S. Levine, V. Kalendra, P. W. Smith, K. V. Lakshmi, and T. D. Tilley, *Organometallics*, 2019, **38**, 1648–1663.
2. A. Paparo, and C. Jones, *Chem. Asian J.*, 2019, **14**, 486 – 490.
3. M. Muhr, P. Heiß, M. Schütz, R. Bühler, C. Gemel, M. H. Linden, H. B. Linden, and R. A. Fischer, *Dalton Trans.*, 2021, **50**, 9031–9036.
4. K. Dehnicke, and B. Neumüller, *Z. Anorg. Allg. Chem.* 2008, **634**, 2703.
5. D. Naglav, M. R. Buchner, G. Bendt, F. Kraus, and S. Schulz, *Angew. Chem. Int. Ed.*, 2016, **55**, 10562.
6. G. M. Sheldrick, SHELXL-97, Program for Crystal Structure Refinement, Göttingen, 1997.
7. G. Sheldrick, *Acta Crystallogr., Sect. C: Struct. Chem.*, 2015, **71**, 3-8.
8. M. J. Frisch, G. W. Trucks, H. B. Schlegel, G. E. Scuseria, M. A. Robb, J. R. Cheeseman, G. Scalmani, V. Barone, G. A. Petersson, and H. Nakatsuji et al., Gaussian 16 Rev. C.01, Wallingford, CT, 2016.
9. a) A. D. Becke, *J. Chem. Phys.*, 1997, **107**, 8554-8560; (b) F. Weigend, and R. Ahlrichs, *Phys. Chem. Chem. Phys.*, 2005, **7**, 3297-3305; (c) J.-D. Chai, and M. Head-Gordon, *Phys. Chem. Chem. Phys.*, 2008, **10**, 6615-6620; (d) S. Grimme, J. Antony, S. Ehrlich, and H. Krieg, *J. Chem. Phys.*, 2010, **132**, 154104.
10. P. Erdmann, J. Leitner, J. Schwarz, and L. Greb, *ChemPhysChem*, 2020, **21**, 987 – 994.
11. (a) T. Lu, and F. Chen, *J. Comput. Chem.*, 2012, **33**, 580-592; (b) R. F. W. Bader, *Atoms in Molecules: A Quantum Theory*; International Series of Monographs in Chemistry, Vol. 2; Oxford University Press: Oxford, U.K., 1990; (c) P. Popelier, *Atoms in Molecules: An Introduction*; Prentice Hall: Harlow, U.K., 2000; (d) R. F. W. Bader, *J. Phys. Chem. A*, 1998, **102**, 7314.
